# Supplementary material for: A peptide hydroxamate library for enrichment of metalloproteinases: towards an affinity-based metalloproteinase profiling protocol
Source: Royal Society of Chemistry journal article supplement (doi:10.1039/b718352f), 2008-01-01

# **A Peptide Hydroxamate Library for Enrichment of Metalloproteinases: Towards an Affinity-Based Metalloproteinase Profiling Protocol**

Paul Geurink, Theo Klein, Michiel Leeuwenburgh, Gijs van der Marel, Henk Kauffman,  
Rainer Bischoff\*\* and Herman Overkleeft\*

\* Department of Bio-organic Synthesis (BioSyn)  
Leiden University  
P.O. Box 9502, 2300 RA, Leiden (The Netherlands)  
Fax: (+31) 71-527-4307  
E-mail: [h.s.overkleeft@chem.leidenuniv.nl](mailto:h.s.overkleeft@chem.leidenuniv.nl)

\*\* Center of Pharmacy, Analytical Biochemistry  
University of Groningen  
Antonius Deusinglaan 1, 9713 GZ, Groningen (The Netherlands)  
Fax: (+31) 50-363-7582  
E-mail: [r.p.h.bischoff@rug.nl](mailto:r.p.h.bischoff@rug.nl)

## **1. Synthetic part**

### *General*

Tetrahydrofuran was distilled over  $\text{LiAlH}_4$  before use. Acetonitrile (ACN), dichloromethane (DCM), *N,N*-dimethylformamide (DMF), *N*-methyl-2-pyrrolidone (NMP), methanol (MeOH), piperidine, diisopropylethylamine (DIPEA) and trifluoroacetic acid (TFA) were of peptide synthesis grade, purchased at Biosolve, and used as received. All general chemicals (Fluka, Acros, Merck, Aldrich, Sigma) were used as received. Rink amide MBHA resin (0.64 mmol/g) was purchased at Novabiochem, as well as all appropriately protected amino acids (FmocAlaOH, FmocArg(Pmc)OH, FmocAsp(tBu)OH, FmocGln(Trt)OH, FmocGlu(tBu)OH, FmocHis(Trt)OH, FmocLeuOH, FmocLys(Boc)OH, FmocPheOH, FmocProOH, FmocSer(tBu)OH, FmocThr(tBu)OH, FmocTrp(Boc)OH, FmocTyr(tBu)OH and FmocValOH). *O*-(1H-6-Chlorobenzotriazolyl)-1,1,3,3-tetramethyluronium hexafluorophosphate (HCTU) was purchased at Iris Biotech (Marktrewitz, Germany). Traces of water were removed from reagents used in reactions that require anhydrous conditions by coevaporation with toluene. Solvents that were used in reactions were stored over 4Å molecular sieves, except methanol and acetonitrile which were stored over 3Å molecular sieves. Molecular sieves were flame dried before use. Unless noted otherwise all reactions were performed under an argon or nitrogen atmosphere.

Column chromatography was performed on Silicycle Silia-P Flash Silica Gel, with a particle size of 40-63  $\mu\text{m}$ . The eluents toluene, ethyl acetate and petroleum ether (40-60 °C boiling range) were distilled prior to use. TLC analysis was conducted on Merck aluminium sheets (Silica gel 60 F<sub>254</sub>). Compounds were visualized by UV absorption (254 nm), by spraying with a solution of  $(\text{NH}_4)_6\text{Mo}_7\text{O}_{24}\cdot 4\text{H}_2\text{O}$  (25 g/L) and  $(\text{NH}_4)_4\text{Ce}(\text{SO}_4)_4\cdot 2\text{H}_2\text{O}$  (10 g/L) in 10% sulfuric acid, a solution of  $\text{KMnO}_4$  (20 g/L) and  $\text{K}_2\text{CO}_3$  (10 g/L) in water, or ninhydrin (0.75 g/L) and acetic acid (12.5 ml/L) in ethanol, where appropriate, followed by charring at ca. 150 °C.

$^1\text{H}$ -,  $^{13}\text{C}$ - and  $^{19}\text{F}$ -NMR spectra were recorded on a Jeol JNM-FX-200 (200MHz), a Bruker DMX-400 (400 MHz) or a Bruker DMX-600 (600 MHz) spectrometer. Chemical shifts are given in ppm ( $\delta$ ) relative to tetramethylsilane ( $^1\text{H}$ -NMR),  $\text{CDCl}_3$  ( $^{13}\text{C}$ -NMR) or TFA ( $^{19}\text{F}$  NMR) as internal standard.

Mass spectra were recorded on a PE/Sciex API 165 instrument equipped with an Electrospray Interface (ESI) (Perkin-Elmer). High resolution MS (HRMS) spectra were recorded with a Finnigan LTQ-FT (Thermo Electron). IR spectra were recorded on a Shimadzu FTIR-8300 and absorptions are given in  $\text{cm}^{-1}$ . Optical rotations  $[\alpha]_D^{23}$  were recorded on a Propol automatic polarimeter at room temperature.

LC-MS analysis was performed on a Jasco HPLC system with a Phenomenex Gemini 3 $\mu\text{m}$  C18 50  $\times$  4.60 mm column (detection simultaneously at 214 and 254 nm), coupled to a PE Sciex API 165 mass spectrometer with ESI. HPLC gradients were 10-90%, 0-50% or 10-50% acetonitrile in 0.1% TFA/water. Chiral HPLC analysis was performed on a Spectroflow 757 system (ABI Analytical Kratos Division, detection at 254 nm) equipped with a Chiralcel OD column (150  $\times$  4.6 mm).

The compounds were purified on a Gilson HPLC system coupled to a Phenomenex Gemini 5 $\mu\text{m}$  250 $\times$ 10 mm column and a GX281 fraction collector. The used gradients were either 0-30% or 10-40% acetonitrile in 0.1% TFA/water, depending on the lipophilicity of the product. Appropriate fractions

were pooled, and concentrated in a Christ rotary vacuum concentrator overnight at room temperature at 0.1 mbar.

### Compounds

The synthesis of compound **1** (scheme 1) has been reported before.<sup>1</sup>

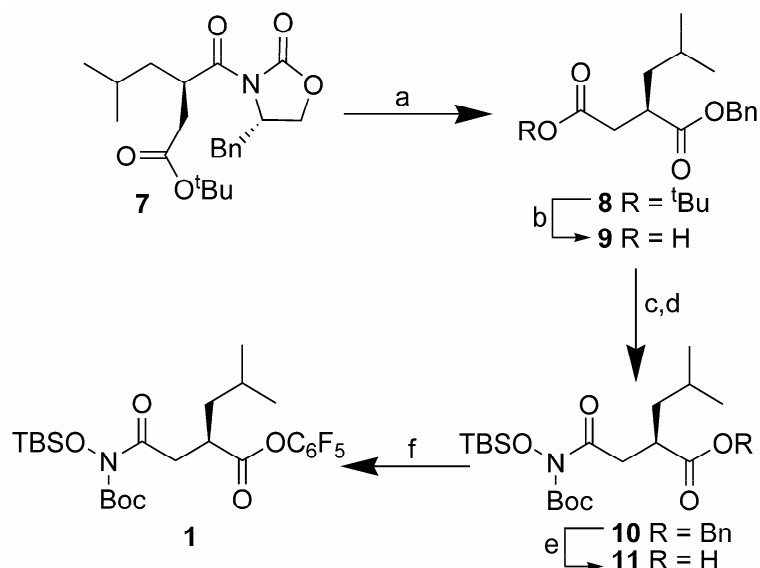

**Scheme 1.** a) BnOH, <sup>n</sup>BuLi, THF, 0 °C, 92%; b) TFA, CH<sub>2</sub>Cl<sub>2</sub>, 94%; c) (ClCO)<sub>2</sub>, cat. DMF, CH<sub>2</sub>Cl<sub>2</sub>; d) TBSONHBoc, DMAP, MeCN, 85% over 2 steps; e) H<sub>2</sub>, Pd/C, MeOH; f) C<sub>6</sub>F<sub>5</sub>OH, EDC, CH<sub>2</sub>Cl<sub>2</sub>, 55% over 2 steps.

*tert-Butyl 3-(R)-benzyloxycarbonyl-5-methylhexanoate (8)*: Benzyl alcohol (1.68 ml, 16.36 mmol) was dissolved in THF (40 ml) and cooled to 0 °C. *n*-BuLi (6.14 mL, 1.6M in THF, 9.8 mmol) was added dropwise and the reaction mixture was stirred for 20 minutes. A solution of compound **7**<sup>2</sup> (3.1 g, 8.18 mmol) in THF (5 mL) was added and the reaction was stirred at 0 °C until TLC analysis (10% ethyl acetate/petroleum ether) revealed a complete reaction (about 4 hours). The reaction mixture was quenched with sat. aqueous NH<sub>4</sub>Cl and extracted 3 times with ethyl acetate. The combined organic layers were dried over MgSO<sub>4</sub> and concentrated. The crude material was purified by column chromatography (3% → 10% ethyl acetate/petroleum ether) giving the product as a colorless oil (yield: 2.4 g, 7.5 mmol, 92%).  $[\alpha]_D^{23} +1.5$  (*c* 1 in CHCl<sub>3</sub>). <sup>1</sup>H-NMR (200 MHz, CDCl<sub>3</sub>): δ (ppm) 7.40-7.25 (m, 5H), 5.13 (2×d, 2H), 2.98-2.83 (m, 1H), 2.62 (dd, 1H, *J*<sub>1</sub> = 16.4 Hz, *J*<sub>2</sub> = 9.1 Hz), 2.35 (dd, 1H, *J*<sub>1</sub> = 16.1 Hz, *J*<sub>2</sub> = 5.2 Hz), 1.63-1.15 (m, 3H), 1.40 (s, 9H), 0.92-0.84 (2×d, 6H). <sup>13</sup>C-NMR (50 MHz, CDCl<sub>3</sub>): δ (ppm) 174.92, 170.80, 135.92, 128.31, 127.95, 80.49, 66.05, 40.97, 39.61, 37.70, 27.84, 25.63, 22.51, 22.05. IR (thin film): 2962.5, 1728.1, 1365.5, 1249.8, 1141.8. HRMS: calculated for C<sub>19</sub>H<sub>28</sub>O<sub>4</sub>+H: 321.2060; found: 321.2064.

*3-(R)-Benzyloxycarbonyl-5-methylhexanoic acid (9)*: Synthesized from **8** as described for its racemic form,<sup>3</sup> however, no spectral data were given for the racemic compound.  $[\alpha]_D^{23} +10.6$  (*c* 1 in CHCl<sub>3</sub>). <sup>1</sup>H-NMR (200 MHz, CDCl<sub>3</sub>): δ (ppm) 7.36-7.29 (m, 5H), 5.14 (s, 2H), 3.00-2.85 (m, 1H), 2.76 (dd,

1H,  $J_1 = 16.8$  Hz,  $J_2 = 9.12$  Hz), 2.48 (dd, 1H,  $J_1 = 16.8$  Hz,  $J_2 = 4.9$  Hz), 1.65-1.29 (m, 3H), 0.93-0.86 (2×d, 6H).  $^{13}\text{C}$ -NMR (50 MHz,  $\text{CDCl}_3$ ):  $\delta$  (ppm) 178.04, 174.86, 135.71, 128.37, 128.01, 127.95, 66.36, 40.91, 39.12, 36.03, 25.60, 22.35, 22.05. IR (thin film): 2954.7, 1705.0, 1450.4, 1388.7, 1157.2. HRMS: calculated for  $\text{C}_{15}\text{H}_{20}\text{O}_4 + \text{H}$ : 265.1434; found: 265.1437.

*Verification of the chiral purity of compound 9*: As a reference compound, the racemic form of **9** was synthesized.<sup>3</sup> NMR data and purities were identical for **9** and its racemate. Chiral HPLC chromatograms are depicted in Figure 1. Based on the relative intensities of the peaks (depicted under the peaks) in chromatogram **B**, the enantiomeric excess of **9** is determined to be >99%.

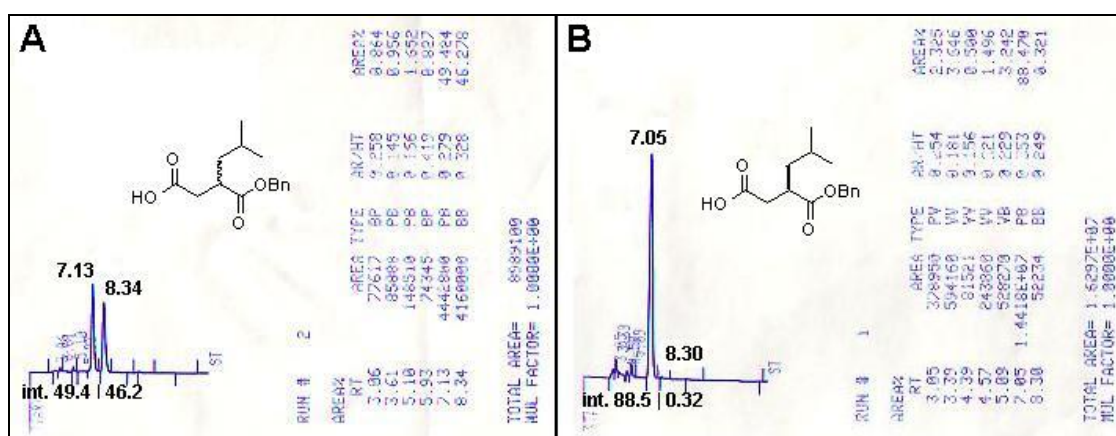

**Figure 1.** Results from the chiral HPLC analysis of (R)-2-isobutylmonobenzylsuccinate **9** and the racemate synthesized by the method of Chatterjee *et al.*<sup>3</sup> Measurements were done with a Chiral OD column; eluent: hexane:isopropanol = 95:5 + 0.25% AcOH; flow: 1 ml/min.; UV detection at 254 nm. Retention times and relative integrals are given. (A) racemate; (B) compound **9**.

*Benzyl 2-(R)-isobutyl-3-(N-tert-butoxycarbonyl-N-(tert-butyltrimethylsilyloxy)carbamoyl)-propionate (10)*: Acid **9** (2.11 g, 8.0 mmol) was dissolved in DCM (30 ml) and DMF (2 drops) was added. The solution was cooled to 0°C and oxalyl chloride (40 mmol, 3.4 mL) was added dropwise. The solution was warmed up to room temperature and stirred until gas evolution ceased (about 30 minutes). Toluene (30 ml) was added and the mixture was concentrated. Residual reagent was removed by repeated coevaporation with toluene. The intermediate acid chloride was obtained as a yellowish oil and used without further purification. The crude acid chloride was redissolved in MeCN (15 ml) and cooled to 0°C. To this, a mixture of N-Boc-O-TBS-hydroxylamine<sup>4</sup> (8.8 mmol, 2.17 g) and DMAP (16 mmol, 1.95 g) in MeCN (15 ml) was added. The reaction mixture was slowly warmed to room temperature and stirred until TLC (10% ethyl acetate/petroleum ether) revealed a complete reaction (approx. 2 hours). The mixture was diluted with Et<sub>2</sub>O (200 mL) and extracted subsequently with 1M HCl and brine. The organic layer was dried over MgSO<sub>4</sub>, filtered and concentrated. The residue was purified by column chromatography (5% ethyl acetate/petroleum ether), giving the product as a colourless oil (yield: 3.36 g, 6.8 mmol, 85%).  $[\alpha]_D^{23} +16.5$  (*c* 1 in  $\text{CHCl}_3$ ).  $^1\text{H}$ -NMR (200 MHz,  $\text{CDCl}_3$ ):  $\delta$  (ppm) 7.35-7.29 (m, 5H), 5.18-5.03 (2×d, 2H,  $J = 12.8$  Hz), 3.24 (dd, 1H,  $J_1 = 17.1$  Hz,  $J_2 = 9.7$  Hz), 3.10-3.00 (m, 1H), 2.88 (dd, 1H,  $J_1 = 17.1$  Hz,  $J_2 = 3.6$  Hz), 1.60-1.10 (m, 3H), 1.53 (s,

9H), 0.98 (s, 9H), 0.92-0.83 (2×d, 6H), 0.12 (s, 3H), 0.10 (s, 3H). <sup>13</sup>C-NMR (50 MHz, CDCl<sub>3</sub>): δ (ppm) 175.28, 170.43, 151.93, 136.04, 128.22, 127.79, 84.13, 65.93, 41.06, 39.67, 39.15, 27.78, 25.60, 22.29, 17.96, -5.21. IR (thin film): 2954.7, 1728.1, 1465.8, 1303.8, 1141.8. HRMS: calculated for C<sub>26</sub>H<sub>43</sub>NO<sub>6</sub>Si+H: 494.2932; found: 494.2933.

*2-(R)-Isobutyl-3-(N-tert-butoxycarbonyl-N-(tert-butyl-dimethylsilyloxy)carbamoyl)propionic acid (II)*: To a solution of compound **10** (3.16 g, 6.4 mmol) in methanol (50 ml) under an argon atmosphere, Pd/C (10%, 150 mg) was added. Hydrogen gas was then bubbled through the mixture until TLC analysis (10% ethyl acetate/petroleum ether) revealed a complete reaction (approx. 1.5 hours). The reaction mixture was filtered over Hyflo and concentrated to obtain the product as a sticky syrup (2.6 g). The compound was used without further purification.  $[\alpha]_D^{23} +12.4^\circ$  (*c* 1 in CHCl<sub>3</sub>). <sup>1</sup>H-NMR (200 MHz, CDCl<sub>3</sub>): δ (ppm) 10.47 (bs, 1H), 3.12 (dd, 1H, *J*<sub>1</sub> = 16.8 Hz, *J*<sub>2</sub> = 8.7 Hz), 3.00-2.70 (m, 2H), 1.70-1.15 (m, 3H), 1.47 (s, 9H), 0.91 (s, 9H), 0.88-0.81 (2×d, 6H), 0.06 (s, 3H), 0.04 (s, 3H). <sup>13</sup>C-NMR (50 MHz, CDCl<sub>3</sub>): δ (ppm) 181.62, 170.49, 151.96, 84.28, 40.85, 39.46, 39.06, 27.81, 25.57, 22.20, 17.96, -5.27. IR (thin film): 2954.7, 1705.0, 1465.8, 1249.8, 1145.5. ESI-MS (*m/z*): 404.2 (M + H<sup>+</sup>), 426.1 (M + Na<sup>+</sup>), 442.4 (M + K<sup>+</sup>), 829.5 (2M + Na<sup>+</sup>), 304.1 (M – Boc + H<sup>+</sup>), 326.0 (M – Boc + Na<sup>+</sup>).

*Pentafluorophenyl 2-(R)-isobutyl-3-(N-tert-butoxycarbonyl-N-(tert-butyl-dimethylsilyloxy)carbamoyl)propionate (I)*: A mixture of crude compound **11** (1.15 g), pentafluorophenol (5.6 mmol, 1.03 g) and CH<sub>2</sub>Cl<sub>2</sub> (15 ml) was treated with EDC (5.6 mmol, 1.07 g). After stirring the mixture at room temperature overnight, Et<sub>2</sub>O (100 ml) was added and the mixture was extracted with 1M HCl and brine, dried over MgSO<sub>4</sub>, filtered and concentrated. The residue was purified by column chromatography (2% ethyl acetate/petroleum ether) and the product was obtained as a colourless oil (Yield: 0.87 g, 1.53 mmol, 55% based on compound **10**).  $[\alpha]_D^{23} +10.9^\circ$  (*c* 1 in CHCl<sub>3</sub>). <sup>1</sup>H-NMR (600 MHz, CDCl<sub>3</sub>): δ (ppm) 3.33-3.28 (m, 2H), 3.09-3.04 (m, 1H), 1.80-1.71 (m, 2H), 1.56 (s, 9H), 1.52-1.47 (m, 1H), 1.00 (d, 3H, *J* = 6.6 Hz), 0.99 (s, 9H), 0.95 (d, 3H, *J* = 6.6 Hz), 0.13, (s, 3H), 0.12 (s, 3H). <sup>13</sup>C-NMR (150 MHz, CDCl<sub>3</sub>): δ (ppm) 171.82, 169.85, 152.03, 141.16 (dd, *J*<sub>1</sub> = 250 Hz *J*<sub>2</sub> = 9 Hz), 139.31 (dt, *J*<sub>1</sub> = 264Hz, *J*<sub>2</sub> = 13.5 Hz), 137.71 (dt, *J*<sub>1</sub> = 249 Hz, *J*<sub>2</sub> = 13.5 Hz), 125.16 (t, *J*<sub>2</sub> = 12.8 Hz) 84.49, 41.02, 39.91, 39.01, 27.75, 25.67, 25.55, 22.24, 22.01, 18.03, -5.31, -5.39. <sup>19</sup>F NMR (376 MHz, CDCl<sub>3</sub>): δ (ppm) -155.72 (d, 2F, *J* = 17.6 Hz), -162.46 (t, 1F, *J* = 21.6 Hz), -166.77 (dd, 2F, *J*<sub>1</sub> = 21.4 Hz, *J*<sub>2</sub> = 17.3 Hz). IR (thin film): 2962.5, 2360.7, 1735.8, 1519.8, 1311.5. HRMS: calculated for C<sub>25</sub>H<sub>36</sub>F<sub>5</sub>NO<sub>6</sub>Si+Na: 592.2124; found: 592.2140.

### Synthesis of the library

Rink amide resin was rinsed with DCM, MeOH and DMF (2× each), then deprotected by shaking with 20% piperidine in DMF for 10 minutes (2×), and rinsed with DMF and DCM (2× each). Loading of the resin was effected by shaking with FmocLys(Boc)OH (5 equiv relative to the stated loading), HCTU (5 equiv) and 0.45 M DIPEA (10 equiv) in NMP for 2 h. The resin was filtered, then rinsed with DMF and DCM (2× each). Any non-reacted amines were capped by shaking the resin with Ac<sub>2</sub>O (5 equiv) in 0.45 M DIPEA (10 equiv) in NMP for 5 minutes. After rinsing the resin with DMF, DCM and Et<sub>2</sub>O (2× each) and drying *in vacuo*, Fmoc determination (UV measurement at 300 nm) gave a loading of 0.47 mmol/g.

Twelve portions of 80 μmol (170 mg resin) were rinsed with DCM and DMF (2× each), deprotected using 20% piperidine in DMF (10 min) and shaken with preactivated solutions of the appropriate Fmoc-amino acids Aa<sup>1</sup> (400 μmol), HCTU (400 μmol, 165 mg) and DIPEA (800 μmol, 1.8 mL 0.45 M in NMP) for 1 h. After rinsing with DMF, DCM and Et<sub>2</sub>O (2× each), and drying *in vacuo*, each portion was in turn divided into eight equal portions. Every portion (~ 10 μmol) was respectively reacted with preactivated solutions of the eight amino acids Aa<sup>2</sup> (50 μmol each), HCTU (50 μmol) and DIPEA (100 μmol as a 0.45 M solution in NMP) and shaken for 1 h. After rinsing the resins with DMF and DCM (2× each), all portions were deprotected using 20% piperidine in DMF for 10 min, then filtered and rinsed with DMF and DCM (2× each). Finally, to all 96 resins was added compound **1** (250 μL 0.2 M in NMP) and DIPEA (44 μL 0.45 M in NMP). After shaking for 2 h, the resins were filtered, rinsed with DMF, MeOH and DCM (2× each) and treated with 95% TFA/water (0.5 mL) for 1 h (with the exception of resins containing Arg(Pmc), these were reacted 2.5 h). The filtrates, as well as small portions of 95% TFA/water used for rinsing the resins, were collected in tubes containing chilled Et<sub>2</sub>O/petroleum ether (1/1, ~ 5 mL) and left at -20 °C overnight. The tubes were then centrifuged, and the filtrates were decanted. The crude products were analysed by LC-MS, then purified by semi-preparative HPLC.

The table below shows the yields of each of the 96 compounds after HPLC purification relative to the initial capacity of the Fmoc-Lys-Rink resin. The first letter corresponds to Aa<sup>1</sup>, the second to Aa<sup>2</sup>. For example, compound DA refers to the compound at which first Asp and then Ala was coupled:

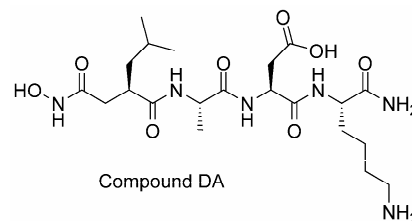

| Compound code | mol. wt. | mg   | μmol | Yield % |
|---------------|----------|------|------|---------|
| DA            | 503      | 1.18 | 2.35 | 23.5    |
| DD            | 547      | 0.33 | 0.6  | 6       |
| DF            | 579      | 0.59 | 1.0  | 10      |
| DH            | 569      | 0.92 | 1.6  | 16      |
| DL            | 545      | 0.68 | 1.2  | 12      |
| DV            | 531      | 0.54 | 1.0  | 10      |
| DW            | 618      | 0.97 | 1.6  | 16      |
| DY            | 595      | 0.88 | 1.5  | 15      |
| EA            | 517      | 1    | 1.93 | 19.3    |
| ED            | 561      | 0.44 | 0.78 | 7.8     |
| EF            | 593      | 0.93 | 1.6  | 16      |
| EH            | 583      | 0.94 | 1.6  | 16      |
| EL            | 559      | 1.05 | 1.88 | 18.8    |
| EV            | 545      | 1.32 | 2.42 | 24.2    |
| EW            | 632      | 0.92 | 1.5  | 15      |
| EY            | 609      | 1.12 | 1.84 | 18.4    |
| FA            | 535      | 1.07 | 2.0  | 20      |
| FD            | 579      | 0.35 | 0.6  | 6       |
| FF            | 611      | 0.49 | 0.8  | 8       |
| FH            | 601      | 1.1  | 1.83 | 18.3    |
| FL            | 577      | 0.41 | 0.71 | 7.1     |
| FV            | 563      | 0.88 | 1.6  | 16      |
| FW            | 650      | 0.47 | 0.72 | 7.2     |
| FY            | 627      | 0.79 | 1.3  | 13      |
| HA            | 525      | 0.72 | 1.4  | 14      |
| HD            | 569      | 0.24 | 0.42 | 4.2     |
| HF            | 601      | 0.48 | 0.8  | 8       |
| HH            | 591      | 0.97 | 1.6  | 16      |
| HL            | 567      | 0.69 | 1.2  | 12      |
| HV            | 553      | 0.46 | 0.83 | 8.3     |
| HW            | 640      | 0.33 | 0.52 | 5.2     |
| HY            | 617      | 0.7  | 1.1  | 11      |
| LA            | 501      | 0.89 | 1.8  | 18      |
| LD            | 545      | 0.17 | 0.31 | 3.1     |
| LF            | 577      | 0.38 | 0.66 | 6.6     |
| LH            | 567      | 1.23 | 2.17 | 21.7    |
| LL            | 543      | 0.61 | 1.1  | 11      |
| LV            | 529      | 0.97 | 1.8  | 18      |
| LW            | 616      | 0.2  | 0.32 | 3.2     |
| LY            | 593      | 0.53 | 0.89 | 8.9     |
| PA            | 485      | 0.87 | 1.8  | 18      |
| PD            | 529      | 0.59 | 1.1  | 11      |
| PF            | 561      | 0.8  | 1.4  | 14      |
| PH            | 551      | 1.04 | 1.89 | 18.9    |
| PL            | 527      | 0.56 | 1.1  | 11      |
| PV            | 513      | 0.88 | 1.7  | 17      |
| PW            | 600      | 0.59 | 0.98 | 9.8     |
| PY            | 577      | 1.27 | 2.2  | 22      |

| Compound code | mol. wt. | mg   | μmol | Yield % |
|---------------|----------|------|------|---------|
| QA            | 516      | 0.44 | 0.85 | 8.5     |
| QD            | 560      | 0.18 | 0.32 | 3.2     |
| QF            | 592      | 0.45 | 0.76 | 7.6     |
| QH            | 582      | 1.56 | 2.68 | 26.8    |
| QL            | 558      | 0.9  | 1.6  | 16      |
| QV            | 544      | 0.56 | 1.0  | 10      |
| QW            | 631      | 0.52 | 0.82 | 8.2     |
| QY            | 608      | 0.17 | 0.28 | 2.8     |
| RA            | 544      | 0.44 | 0.81 | 8.1     |
| RD            | 588      | 0.81 | 1.38 | 13.8    |
| RF            | 620      | 0.3  | 0.48 | 4.8     |
| RH            | 610      | 1.21 | 1.98 | 19.8    |
| RL            | 586      | 1.03 | 1.76 | 17.6    |
| RV            | 572      | 0.68 | 1.2  | 12      |
| RW            | 659      | 0.38 | 0.58 | 5.8     |
| RY            | 636      | 0.42 | 0.66 | 6.6     |
| SA            | 475      | 0.73 | 1.5  | 15      |
| SD            | 519      | 0.21 | 0.4  | 4       |
| SF            | 551      | 0.55 | 1.0  | 10      |
| SH            | 541      | 1.3  | 2.4  | 24      |
| SL            | 517      | 1.08 | 2.09 | 20.9    |
| SV            | 503      | 0.72 | 1.4  | 14      |
| SW            | 590      | 0.61 | 1.0  | 10      |
| SY            | 567      | 0.55 | 0.97 | 9.7     |
| TA            | 489      | 2.05 | 4.19 | 41.9    |
| TD            | 532      | 0.36 | 0.68 | 6.8     |
| TF            | 565      | 0.78 | 1.4  | 14      |
| TH            | 555      | 1.09 | 1.96 | 19.6    |
| TL            | 531      | 0.32 | 0.6  | 6       |
| TV            | 517      | 1.3  | 2.51 | 25.1    |
| TW            | 604      | 0.44 | 0.73 | 7.3     |
| TY            | 581      | 1.67 | 2.87 | 28.7    |
| WA            | 574      | 0.62 | 1.1  | 11      |
| WD            | 618      | 0.15 | 0.24 | 2.4     |
| WF            | 650      | 0.2  | 0.31 | 3.1     |
| WH            | 640      | 0.65 | 1.0  | 10      |
| WL            | 616      | 0.35 | 0.57 | 5.7     |
| WV            | 602      | 0.36 | 0.6  | 6       |
| WW            | 689      | 0.32 | 0.46 | 4.6     |
| WY            | 666      | 0.22 | 0.33 | 3.3     |
| YA            | 551      | 1.29 | 2.34 | 23.4    |
| YD            | 595      | 0.31 | 0.52 | 5.2     |
| YF            | 627      | 0.43 | 0.69 | 6.9     |
| YH            | 617      | 1.7  | 2.76 | 27.6    |
| YL            | 593      | 0.91 | 1.5  | 15      |
| YV            | 579      | 0.64 | 1.1  | 11      |
| YW            | 666      | 0.45 | 0.68 | 6.8     |
| YY            | 627      | 0.42 | 0.67 | 6.7     |

## **2. Biochemical part**

### *Materials*

Recombinant human MMP-12 catalytic domain and MMP-9 catalytic domain (without fibronectin type II inserts) were a gift from AstraZeneca R&D (Lund & Moelndal, Sweden) and were produced in *E. coli* (Parkar 2000, Shipley 1996). Recombinant human ADAM-17 ectodomain was from R&D systems.

The fluorogenic MMP substrate Mca-PLGL-Dpa-AR-NH<sub>2</sub> (where Mca = (7-methoxycoumarin-4-yl)acetyl and Dpa = dinitrophenyl)-L-2,3-diaminopropionyl) was from Bachem, the ADAM substrate Mca-PLAQAV-Dpa-RSSSR-NH<sub>2</sub> was from R&D systems.

*N*-hydroxysuccinimide (NHS)-Sepharose was from Amersham Bioscience.

Acetonitrile (gradient grade) was from Biosolve, ultra-pure water was produced in-house by an Elga water purifying system and used for all mobile phase and buffer preparations.

Other chemicals were purchased from Sigma.



### Determination of inhibitor efficacy

The efficacy of the novel inhibitors was tested by evaluating their ability to inhibit proteolytic conversion of a fluorogenic substrate by recombinant metalloproteases. A fixed concentration of each inhibitor (final concentration 100 nM) was incubated with 5 ng of either MMP-9 catalytic domain, MMP-12 catalytic domain or ADAM-17 ectodomain in assay buffer (for MMP-9 and -12: 50 mM Tris pH 7.4, 0,1 M NaCl, 10 mM CaCl<sub>2</sub>, 0.05 % w/v Brij-35; for ADAM-17: 25 mM Tris pH 9.0, 2.5 μM ZnCl<sub>2</sub>, 0.005% w/v Brij-35) in 96-well plates (Costar White). The appropriate fluorogenic substrate was added to a final concentration of 2 μM and proteolysis rates were determined by measuring fluorescence ( $\lambda_{\text{ex,em}} = 320, 440 \text{ nm}$ ) increase using a Fluostar Optima plate reader (BMG Labtech) at 28°C. The remaining catalytic activity was calculated by comparing with proteolysis rates of 5 ng uninhibited enzyme (see table below) and plotted in heat maps generated in Matlab (thanks to Peter Horvatovich, University of Groningen).

| Inhibitor | MMP9  | MMP12 | ADAM17 | Inhibitor | MMP9  | MMP12 | ADAM17 | Inhibitor | MMP9 | MMP12 | ADAM17 |
|-----------|-------|-------|--------|-----------|-------|-------|--------|-----------|------|-------|--------|
| DA        | 97,3  | 25,3  | 90,0   | LA        | 98,7  | 36,2  | 73,5   | SA        | 69,2 | 29,1  | 42,2   |
| DD        | 102,3 | 51,4  | 105,7  | LD        | 98,2  | 55,2  | 92,1   | SD        | 66,2 | 42,5  | 96,2   |
| DF        | 55,8  | 4,3   | 92,5   | LF        | 57,0  | 2,1   | 25,4   | SF        | 8,6  | 7,2   | 11,2   |
| DH        | 90,8  | 11,6  | 97,6   | LH        | 92,5  | 13,7  | 69,0   | SH        | 27,9 | 14,7  | 33,6   |
| DL        | 95,2  | 7,4   | 98,7   | LL        | 98,3  | 4,3   | 41,6   | SL        | 28,4 | 9,0   | 11,8   |
| DV        | 106,0 | 11,0  | 100,6  | LV        | 85,6  | 8,6   | 30,0   | SV        | 30,1 | 9,6   | 8,4    |
| DW        | 70,4  | 8,5   | 108,0  | LW        | 42,6  | 2,3   | 36,5   | SW        | 3,4  | 3,1   | 14,1   |
| DY        | 65,3  | 9,0   | 101,8  | LY        | 53,7  | 3,6   | 32,8   | SY        | 3,7  | 5,0   | 8,9    |
| EA        | 101,2 | 45,0  | 92,3   | PA        | 101,8 | 83,9  | 64,8   | TA        | 99,3 | 74,2  | 86,0   |
| ED        | 103,2 | 85,5  | 91,4   | PD        | 97,8  | 101,2 | 94,0   | TD        | 95,4 | 62,1  | 94,8   |
| EF        | 77,8  | 7,6   | 86,8   | PF        | 72,9  | 63,2  | 49,7   | TF        | 50,8 | 15,9  | 41,2   |
| EH        | 98,2  | 11,4  | 99,5   | PH        | 84,9  | 68,2  | 50,3   | TH        | 73,2 | 22,9  | 66,0   |
| EL        | 106,2 | 18,1  | 92,2   | PL        | 100,2 | 77,5  | 43,0   | TL        | 52,7 | 8,8   | 26,7   |
| EV        | 106,8 | 23,4  | 96,7   | PV        | 97,4  | 50,3  | 48,5   | TV        | 70,0 | 19,4  | 26,0   |
| EW        | 103,3 | 33,0  | 103,3  | PW        | 73,1  | 36,9  | 63,7   | TW        | 21,2 | 7,1   | 35,8   |
| EY        | 86,8  | 10,2  | 99,7   | PY        | 72,5  | 45,3  | 63,3   | TY        | 32,7 | 13,5  | 33,7   |
| FA        | 96,7  | 24,4  | 47,6   | QA        | 100,0 | 36,0  | 68,0   | WA        | 84,6 | 16,3  | 56,3   |
| FD        | 91,8  | 43,3  | 92,8   | QD        | 96,6  | 59,0  | 90,7   | WD        | 85,0 | 45,6  | 96,7   |
| FF        | 24,6  | 0,6   | 16,4   | QF        | 73,3  | 8,7   | 57,8   | WF        | 21,6 | 4,3   | 23,0   |
| FH        | 81,4  | 63,1  | 67,9   | QH        | 90,8  | 61,4  | 87,0   | WH        | 48,5 | 7,2   | 58,6   |
| FL        | 79,7  | 3,7   | 33,3   | QL        | 90,0  | 7,7   | 53,9   | WL        | 33,6 | 2,9   | 21,2   |
| FV        | 82,6  | 3,4   | 19,4   | QV        | 97,1  | 9,5   | 53,9   | WV        | 64,6 | 6,3   | 20,4   |
| FW        | 10,4  | 0,4   | 40,2   | QW        | 42,7  | 2,8   | 58,8   | WW        | 18,5 | 4,6   | 48,3   |
| FY        | 49,8  | 9,0   | 55,6   | QY        | 12,8  | 1,9   | 16,1   | WY        | 8,1  | 4,2   | 13,3   |
| HA        | 95,1  | 44,6  | 78,8   | RA        | 97,6  | 25,8  | 23,2   | YA        | 88,4 | 17,9  | 60,8   |
| HD        | 93,8  | 82,7  | 89,8   | RD        | 96,2  | 81,5  | 87,6   | YD        | 70,5 | 32,6  | 81,3   |
| HF        | 31,3  | 4,1   | 35,4   | RF        | 66,5  | 4,6   | 6,5    | YF        | 13,2 | 1,8   | 16,3   |
| HH        | 72,2  | 17,4  | 67,0   | RH        | 88,1  | 14,0  | 14,7   | YH        | 52,7 | 12,2  | 64,0   |
| HL        | 72,1  | 7,4   | 43,7   | RL        | 93,8  | 12,8  | 8,8    | YL        | 52,1 | 5,2   | 25,0   |
| HV        | 86,4  | 15,0  | 49,6   | RV        | 99,5  | 9,5   | 5,0    | YV        | 54,8 | 4,3   | 17,4   |
| HW        | 21,0  | 3,2   | 53,4   | RW        | 54,1  | 4,4   | 9,5    | YW        | 4,9  | 3,2   | 28,1   |
| HY        | 29,2  | 7,6   | 56,1   | RY        | 42,8  | 4,0   | 7,2    | YY        | 8,1  | 1,1   | 18,3   |

*Remaining enzyme activity (%) after inhibition.*

### *Determination of IC<sub>50</sub> values*

The IC<sub>50</sub> values of eight selected novel inhibitors were determined in a competitive enzyme activity assay monitoring conversion of the same fluorogenic substrates by recombinant metalloproteinases in presence of increasing concentrations inhibitor. Measurements were performed in 96-well plates (Costar white), where each well contained 5 ng of either MMP-9 catalytic domain, MMP-12 catalytic domain or ADAM-17 and a final concentration of 2 μM of the appropriate substrate in a final volume of 100 μl assay buffer. Proteolysis rates were determined by measuring fluorescence increase like above. Seven-point inhibition curves (0-10 μM) were plotted in Origin 7.0 (Micronal) and IC<sub>50</sub> values were determined by sigmoidal fitting.

### *Immobilization of inhibitors on Sepharose beads*

The eight selected inhibitors were linked to Sepharose like described earlier.<sup>5</sup> Briefly NHS-activated Sepharose beads were washed at 4°C with several volumes of 1 mM HCl and several volumes of coupling buffer (0.1 M K<sub>2</sub>HPO<sub>4</sub>, pH 7.5). The washed beads were then incubated with an equal volume of a 5 mM solution of inhibitor in coupling buffer for 2h in a shaking incubator (Eppendorf thermomixer, 1200 rpm, 25°C). After removal of the supernatant the unreacted NHS-groups were quenched by incubation with 10 bead volumes of blocking buffer (0.5 M ethanolamine in coupling buffer).

The immobilization was monitored by HPLC analysis of each inhibitor-containing coupling buffer before and after the procedure. Analysis was performed on a Merck-Hitachi system fitted with a UV detector at 214 nm. Samples were separated on a Zorbax Eclipse XDB-C8 column (4.6 x 150 mm, 5 μm particles, Agilent technologies). Mobile phase A was 0.1 % v/v TFA in water, mobile phase B was 0.1 % TFA in acetonitrile. Samples were diluted ten times in mobile phase A and 10 μL was injected. A linear gradient separation was performed by increasing the percentage B from 0 to 60 % in 30 minutes. The theoretical ligand density for each immobilized inhibitor was calculated by evaluation of the peak-area for the free inhibitor before and after the immobilization (see table below).

|    | [immobilized inhibitor] (mM) |
|----|------------------------------|
| DV | 5.00 <sup>a</sup>            |
| FF | 4.58                         |
| FW | 4.98                         |
| PD | 4.88                         |
| PL | 3.23                         |
| QY | 4.48                         |
| SF | 3.73                         |
| YW | 4.75                         |

<sup>a</sup> No detectable inhibitor remained after immobilization.

#### *Determination of extraction yield with the immobilized inhibitors*

The efficacy of the immobilized inhibitors for use as activity-based affinity ligands in solid phase extraction (SPE) of MMPs and ADAMs was determined by performing column-based extractions on each material. Each batch of inhibitor-beads was slurry packed into Prospekt SPE cartridges fitted on one side with a 0.2  $\mu\text{m}$  stainless steel frit (Spark Holland, 2 mm ID x 10 mm) in MMP assay buffer. The packed cartridges were placed in a clamp and attached to a syringe pump (KD scientific). Extractions were performed in the assay buffers described above. Before extraction the cartridges were conditioned by flushing two times 250  $\mu\text{L}$  of the appropriate assay buffer. All steps were performed at 50  $\mu\text{L}/\text{min}$ .

Samples containing recombinant enzyme (200  $\mu\text{L}$  of 0.5 or 5 nM solution) were applied to the cartridges and the cartridges were washed with four times 200  $\mu\text{L}$  assay buffer to determine breakthrough. All eluting fractions were collected separately and immediately placed on ice. Between extractions the cartridges were regenerated by eluting bound enzyme with 10 mM EDTA in assay buffer and reconditioning with two times 200  $\mu\text{L}$  assay buffer.

Enzyme activity in the collected fractions was determined by the activity assay described above and related to the activity in the original sample.

#### *Extraction of active ADAM-17 from lung carcinoma*

Human alveolar carcinoma cell line A549 (ATCC nr. CCL-185) was grown to 90% confluency in RPMI-1640 with l-glutamine (Cambrex) supplemented with 10% (v/v) fetal bovine serum (Cambrex) and 20  $\mu\text{g}/\text{mL}$  gentamycin (Centafarm) in 25  $\text{cm}^2$  culture plates at 37°C, 5%  $\text{CO}_2$ . The cells were serum starved for 24 h and stimulated with 100 nM phorbol 12-myristate 13-acetate (PMA, Sigma-Aldrich) for different time periods.

After stimulation, the cells were harvested in 1 mL ice-cold lysis buffer (25 mM Tris pH 9.0, 2.5  $\mu\text{M}$   $\text{ZnCl}_2$ , 1 % v/v Triton X-100). After cell lysis (1h on ice) the lysates were centrifuged in a cooled (4°C) Eppendorf centrifuge at 20.000 x g for 15 minutes to remove cell debris. The supernatant was kept on ice until the extraction.

Spark cartridges (2 mm ID x 10 mm) packed with either Sepharose immobilized inhibitor FF or control ethanolamine Sepharose were equilibrated with lysis buffer (2 x 250  $\mu\text{L}$  pumped at 50  $\mu\text{L}/\text{min}$ ). The lysates were applied to the cartridge (250  $\mu\text{L}$ , 25  $\mu\text{L}/\text{min}$ ) and the flowthrough was collected. The cartridges were washed once with lysis buffer (250  $\mu\text{L}$ , 50  $\mu\text{L}/\text{min}$ ) and three times with wash buffer (25 mM Tris pH 9.0, 2.5  $\mu\text{M}$   $\text{ZnCl}_2$ , 0.005 % v/v Brij-35). Elution was carried out by competitive elution with a competitive inhibitor in wash buffer (100  $\mu\text{M}$  inhibitor SF, 3 x 60  $\mu\text{L}$ , 10  $\mu\text{L}/\text{min}$ ) and a non-specific elution step with 1% SDS in wash buffer (100  $\mu\text{L}$ , 20  $\mu\text{L}/\text{min}$ ).

60  $\mu\text{L}$  of each sample was diluted with 20  $\mu\text{L}$  non-reducing sample buffer (Bio-Rad) and after heating (5 min at 95°C) separated by discontinuous SDS-PAGE according to Laemmli [Laemmli, U.K., Cleavage of structural proteins during the assembly of the head of bacteriophage T4. *Nature* **227**, 680-

685, (1970)] on 0.75 mm thick slabs (8 % polyacrylamide). Electrophoresis was carried out in a Mini-Protean III cell (Bio-Rad).

The proteins were transferred to Immun-blot PVDF membranes (Bio-Rad) by wet Western blotting in a mini Trans-blot cell (Bio-Rad) at 350 mA for 60 minutes in 25 mM Tris, 190 mM glycine with 20% v/v methanol. The membranes were blocked overnight in TBS-T (10 mM Tris pH 7.4, 137 mM NaCl, 0.05% (v/v) Tween-20) supplemented with 5 % w/v non-fat dried milk (Protifar, Nutricia) at 4°C. Incubation with the primary anti-ADAM17 ectodomain monoclonal antibody (R&D systems, clone 111636) was performed at room temperature for 2 h at 0.5 µg/mL in TBS-T with 1 % w/v non-fat milk, followed by 1.5 h exposure to a secondary rabbit anti-mouse antibody conjugated with alkaline phosphatase (Sigma-Aldrich) at a 1:15,000 dilution. Bands were visualized with 5-bromo-4-chloro-3-indolyl phosphate/nitroblue tetrazolium (Duchefa).

## References

- 1 M. A. Leeuwenburgh, P. P. Geurink, T. Klein, H. F. Kauffman, G. A. van der Marel, R. Bischoff and H. S. Overkleeft, *Org. Lett.*, 2006, **8**, 1705.
- 2 F. Augé, W. Hornebeck, M. Decarme and J. Y. Laronze, *Bioorg. Med. Chem. Lett.*, 2003, **13**, 1783. D. E. Levy, F. Lapierre, W. Liang, W. Ye, C. W. Lange, X. Li, D. Grobelny, M. Casabonne, D. Tyrrell, K. Holme, A. Nadzan and R. E. Galardy, *J. Med. Chem.*, 1998, **41**, 199.
- 3 S. Chatterjee, M. Iqbal, S. Mallya, S. E. Senadhi, T. M. O'Kane, B. A. McKenna, D. Bozyczko-Coyne, J. C. Kauer, R. Siman and J. P. Mallamo, *Bioorg. Med. Chem.*, 1998, **41**, 509.
- 4 J. M. Altenburger, C. Mioskowski, H. d'Orchymont, D. Schirlin, C. Schalk and C. Tarnus, *Tetrahedron Lett.*, 1992, **33**, 5055.
- 5 J. R. Freije, T. Klein, J. A. Ooms, J. P. Franke and R. Bischoff, *Prot. Res.*, 2006, **5**, 1186.

# Compound 4

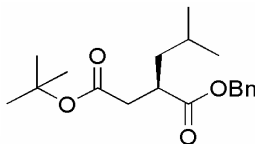

paulg.354

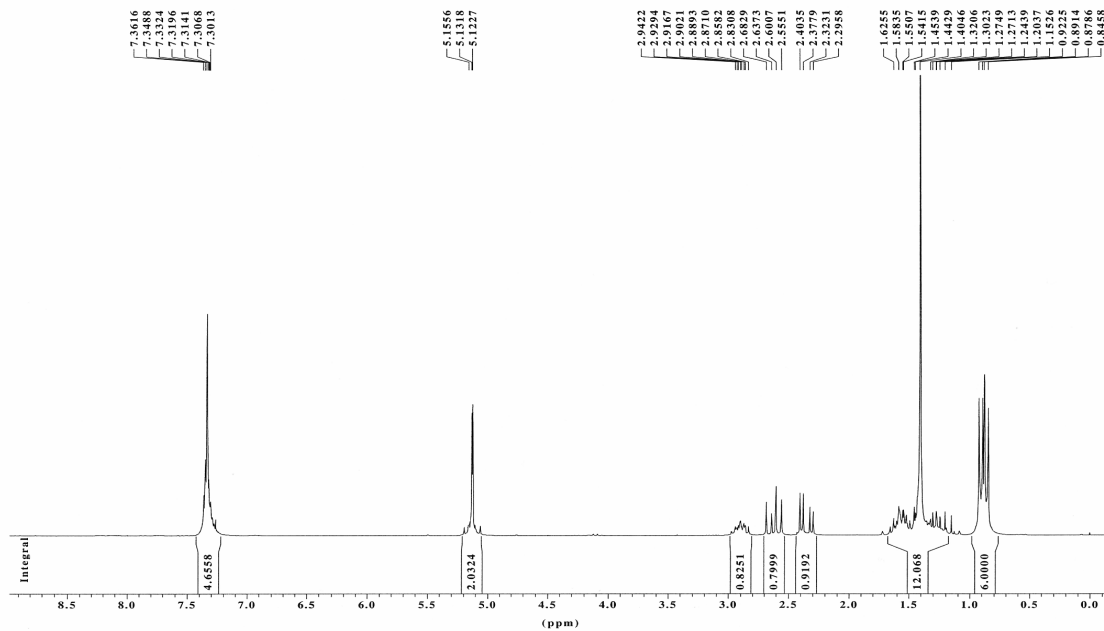

paulg.355

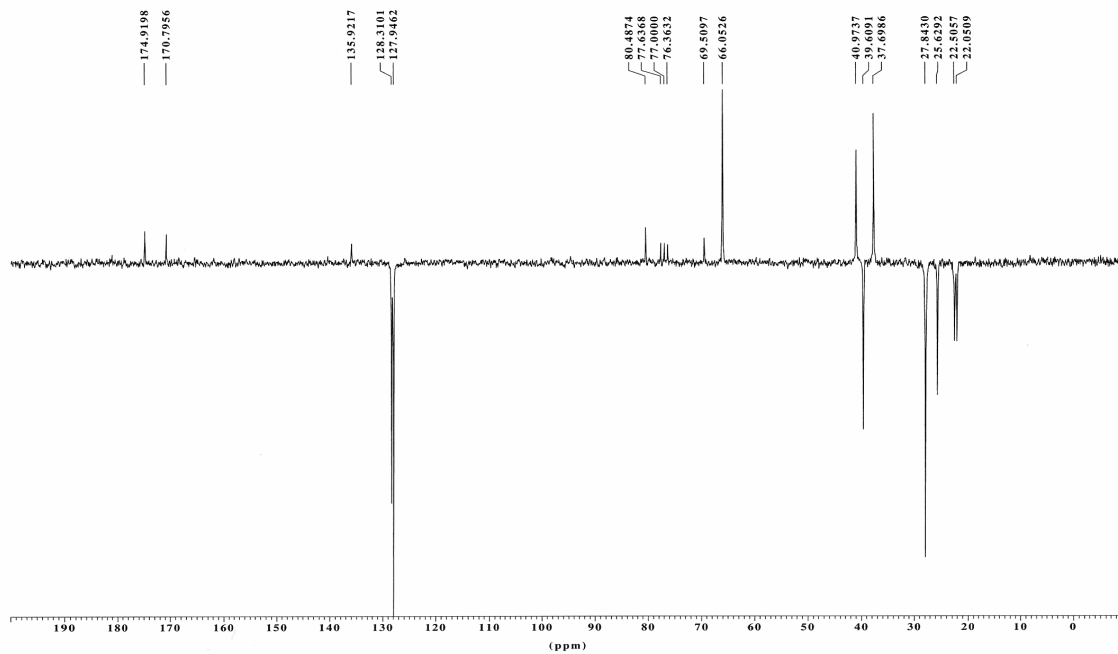

# Compound 5

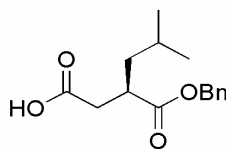

paulg.330

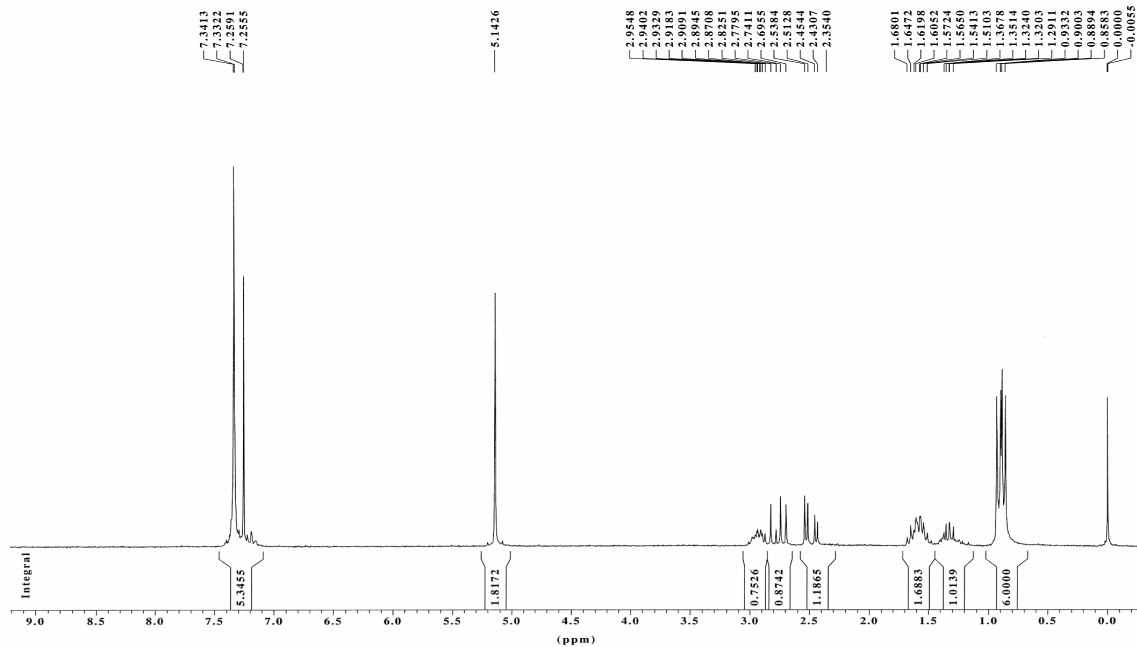

ml.056

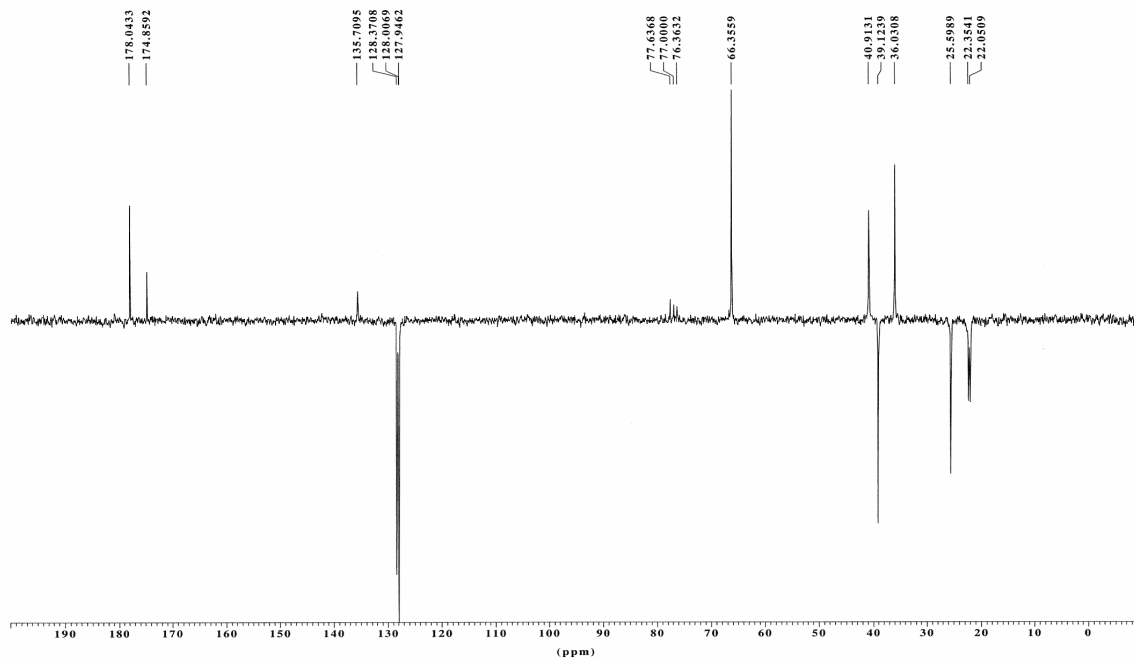

# Compound 6

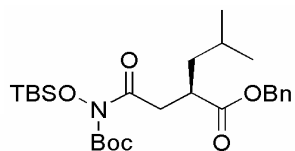

paulg.278

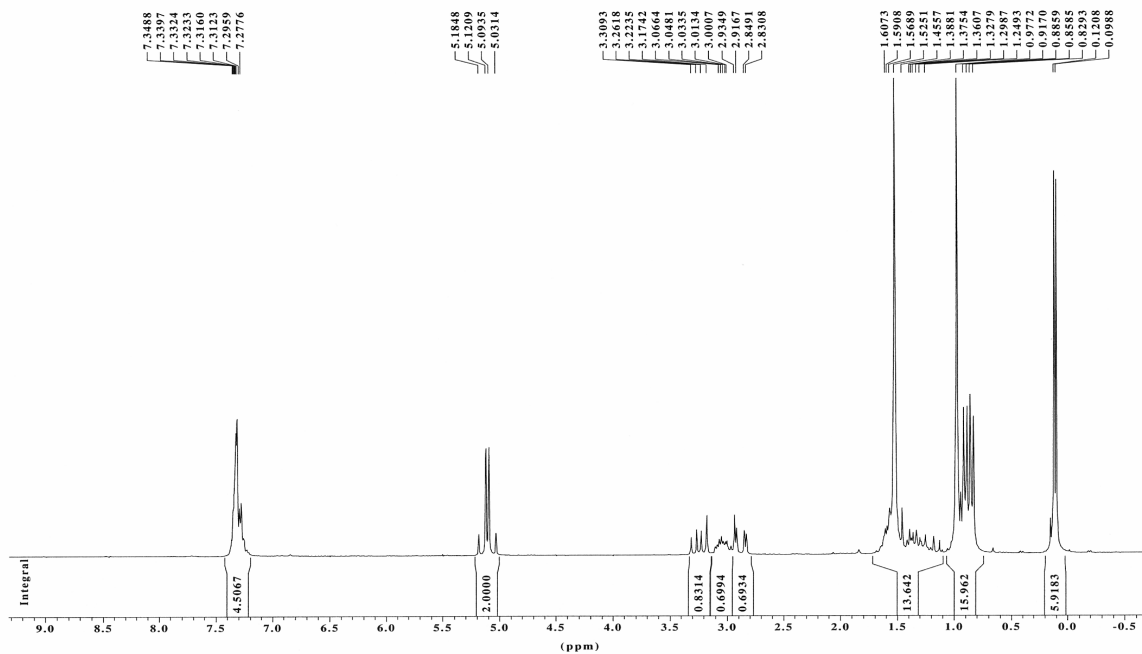

paulg.277

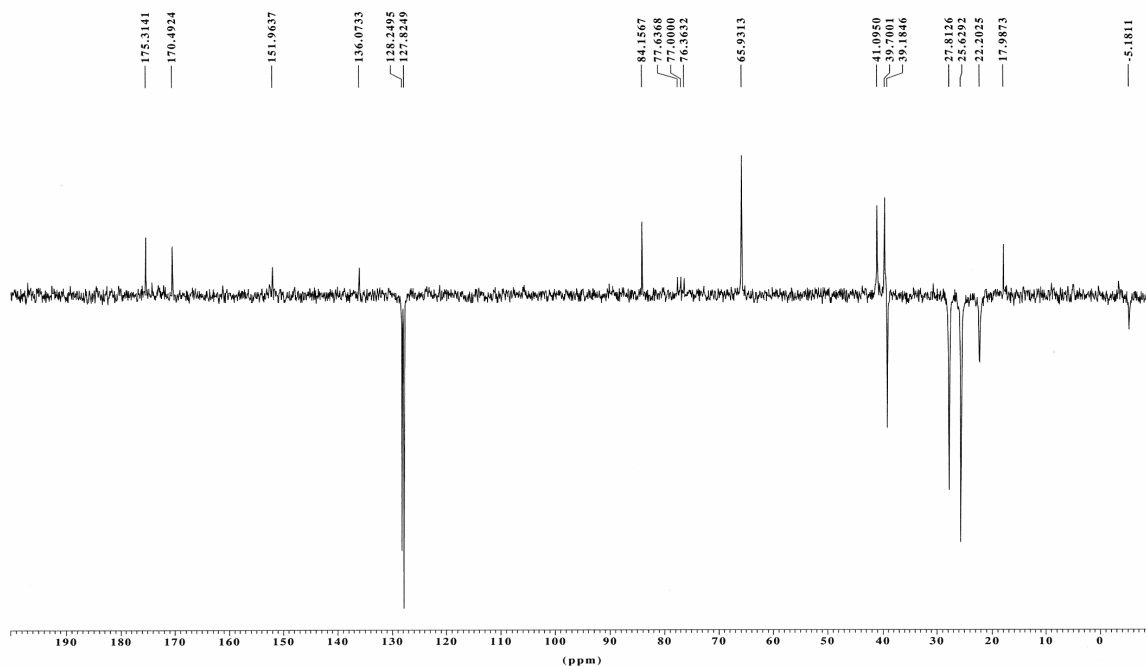





# Compound 1

1H NMR dmx-600

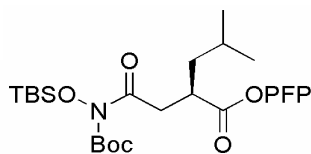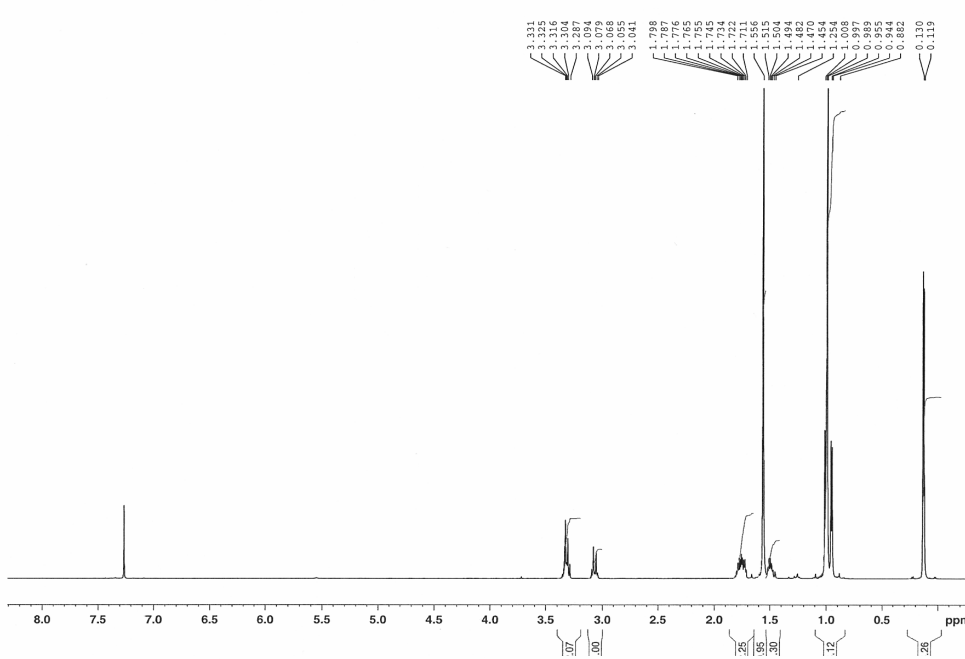

```
Current Data Parameters
NAME: biosay1220060a1
EXPNO: 1
PROCNO: 1
F2 - Acquisition Parameters
Date_: 20061212
Time: 9.00
INSTRUM: dmx600
PROBHD: 5 mm CPXI 1H-
PULPROG: zg30
TD: 65536
SOLVENT: CDCl3
NS: 17
DS: 4
SWH: 8922.896 Hz
FIDRES: 0.137219 Hz
AQ: 3.6438512 sec
RG: 64
RM: 55.600 use
DE: 8.50 use
TE: 298.0 K
D1: 2.0000000 sec
TDO: 1
***** CHANNEL f1 *****
NUC1: 1H
P1: 8.10 use
PL1: -6.00 dB
SFO1: 600.131910 MHz
F2 - Processing parameters
SI: 32768
SF: 600.1319176 MHz
WDW: EM
SSB: 0
GB: 0
PC: 1.00
```

13C APT dmx-600 PG01 in CDCL3

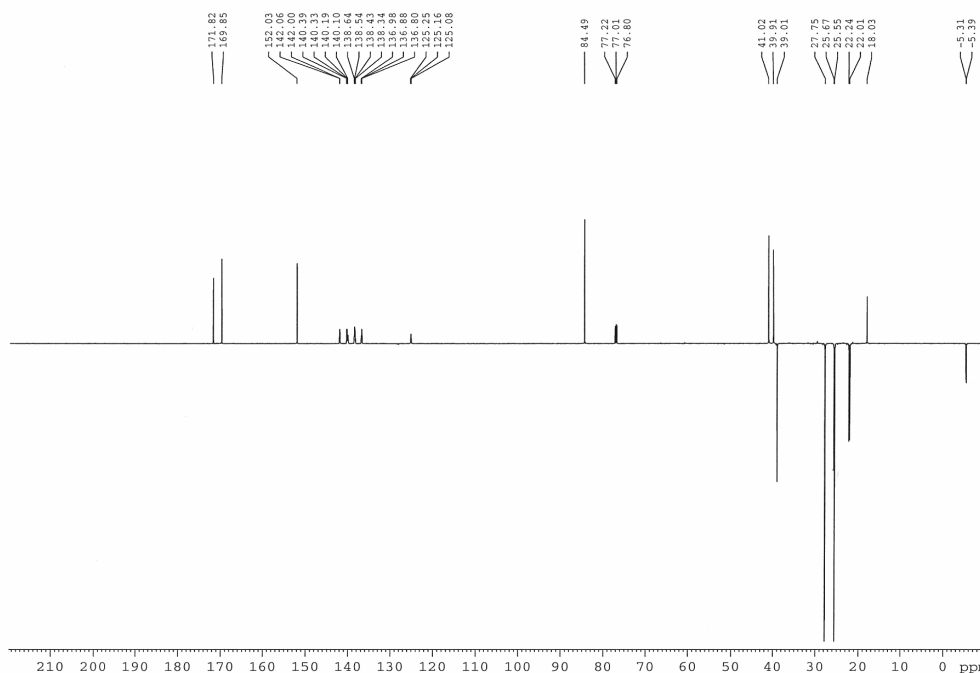

```
Current Data Parameters
NAME: biosay1220060a1
EXPNO: 3
PROCNO: 1
F2 - Acquisition Parameter
Date_: 20061212
Time: 12.18
INSTRUM: dmx600
PROBHD: 5 mm CPXI 1H-
PULPROG: jmod
TD: 131972
SOLVENT: CDCl3
NS: 104
DS: 2
SWH: 34722.193 Hz
FIDRES: 0.264910 Hz
AQ: 1.8974868 sec
RG: 8192
RM: 14.400 use
DE: 8.50 use
TE: 298.0 K
CNST1: 155.000000
CNST11: 1.000000
D1: 1.5000000 sec
d20: 0.00845161 sec
DELTA: 0.00001592 sec
TDO: 16
***** CHANNEL f1 *****
NUC1: 13C
P1: 12.50 use
PL1: 25.00 dB
SFO1: 150.9185940 MHz
***** CHANNEL f2 *****
CPDPRG2: waltz16
NUC2: 1H
P2PRG2: 80.00 use
PL2: -6.00 dB
PL12: 13.68 dB
SFO2: 600.1324000 MHz
F2 - Processing parameters
SI: 65536
SF: 150.9028134 MHz
WDW: EM
SSB: 0
GB: 0
PC: 1.00
```

Pg01 in CDCL3 19Fluor nmr av400 ref= cf3cooh in CDCL3 = -79.59 ppm

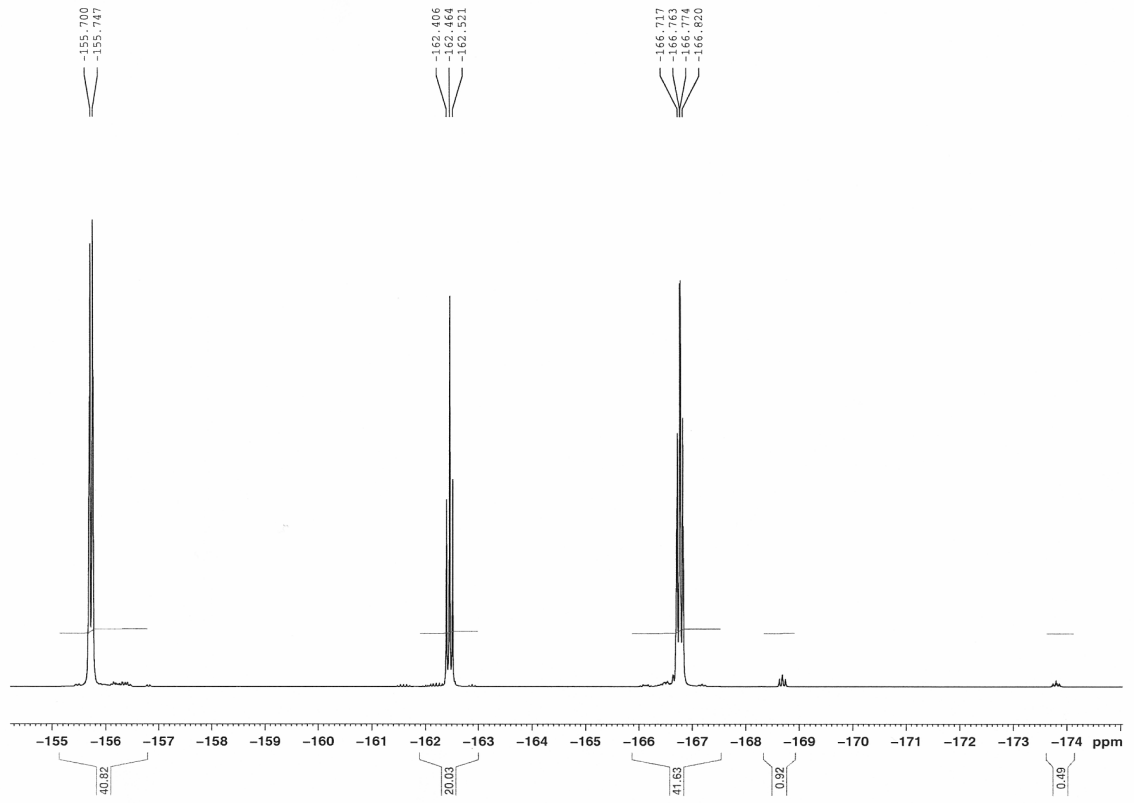

```
===== Data Parameters =====
Date_   : 20110909
Time    :
F1 (MHz):
F2 (MHz):
Acq (s) : 0002.11
RG      : 655360
SFO (ppm): 500.13
NUC1    : 19F
P1 (us) : 10
PL1     : 0
SFO (ppm): 500.13
===== Processing parameters =====
Date_   : 20110909
Time    : 11:52
F1 (MHz): 500.13
F2 (MHz): 500.13
Acq (s) : 0002.11
RG      : 655360
SFO (ppm): 500.13
===== CHANNEL f1 =====
NUC1    : 19F
P1 (us) : 10
PL1     : 0
SFO (ppm): 500.13
===== Processing parameters =====
Date_   : 20110909
Time    : 11:52
F1 (MHz): 500.13
F2 (MHz): 500.13
Acq (s) : 0002.11
RG      : 655360
SFO (ppm): 500.13
```

# Compound RH

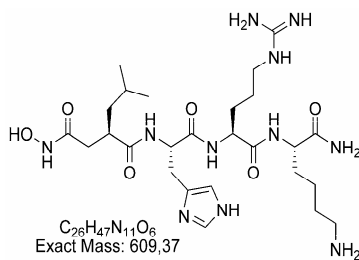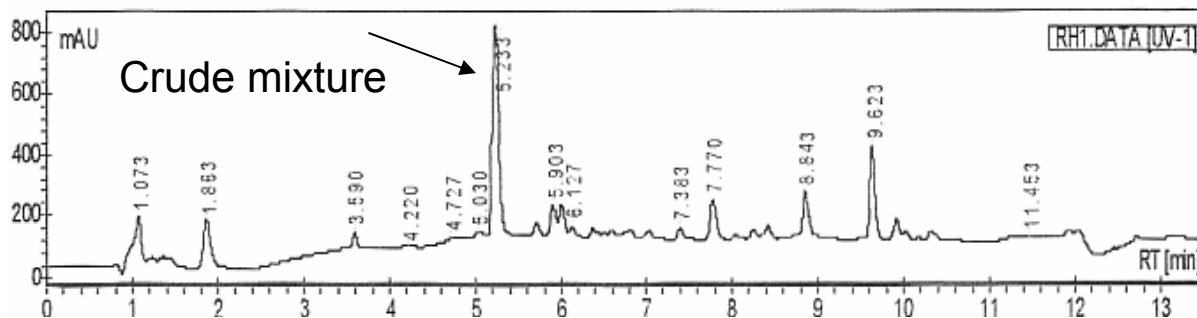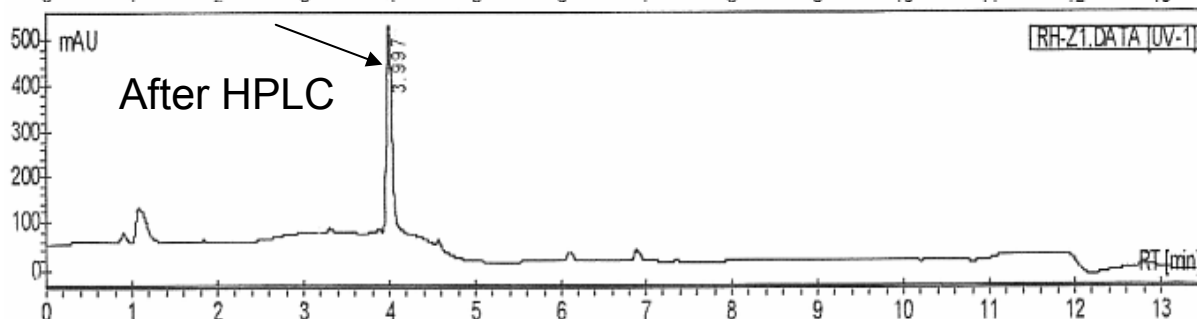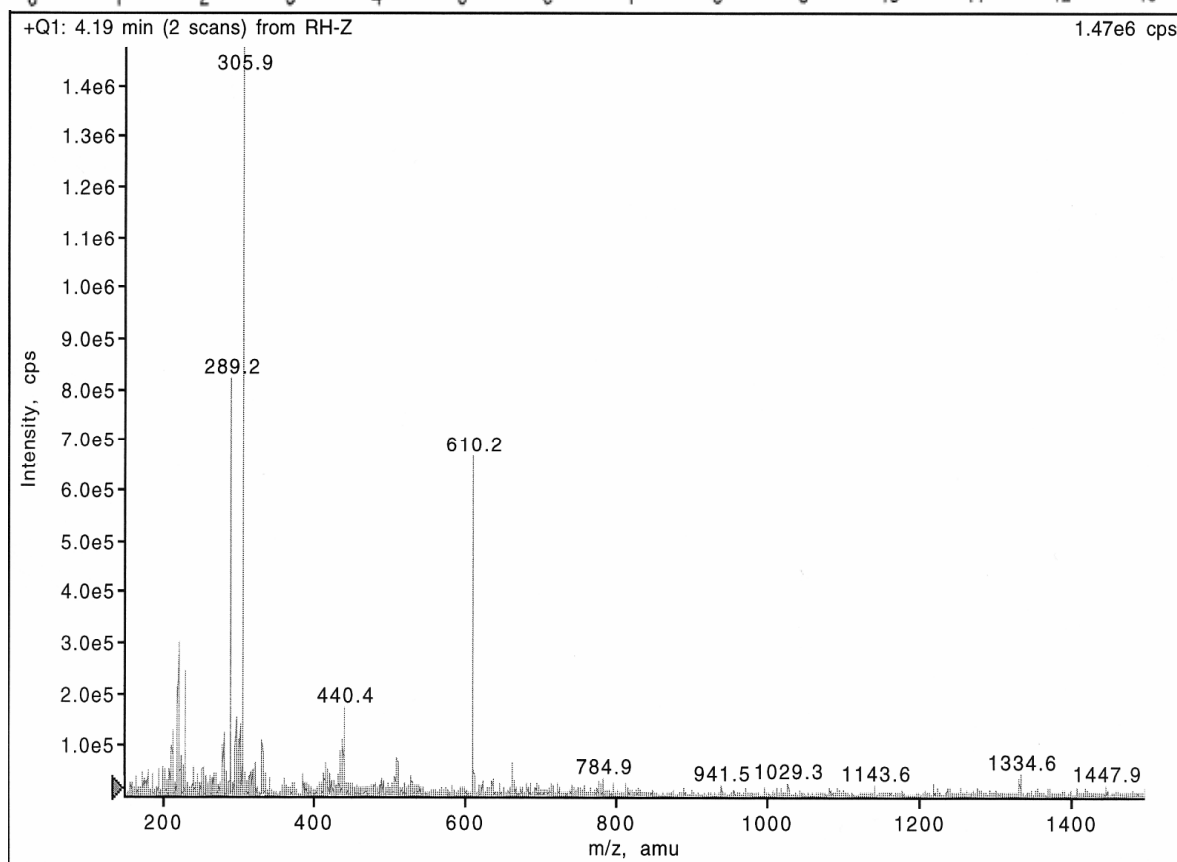



# Compound FL

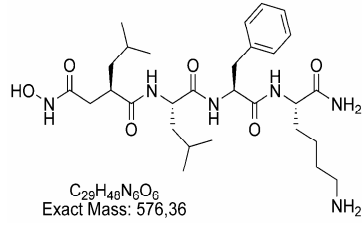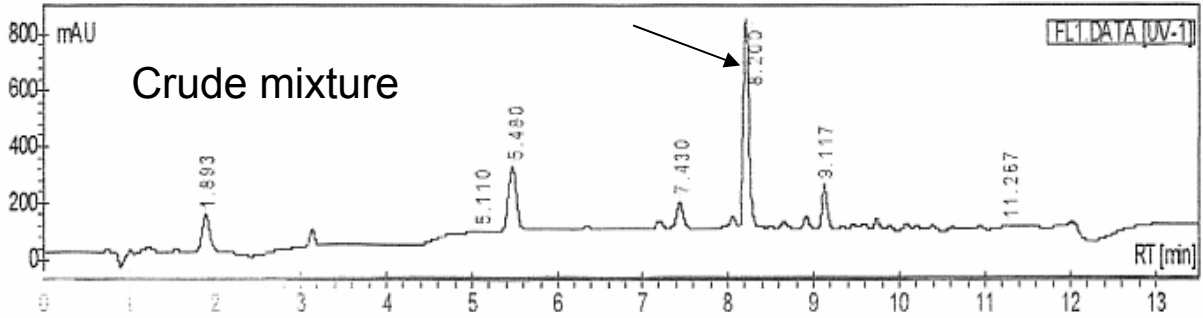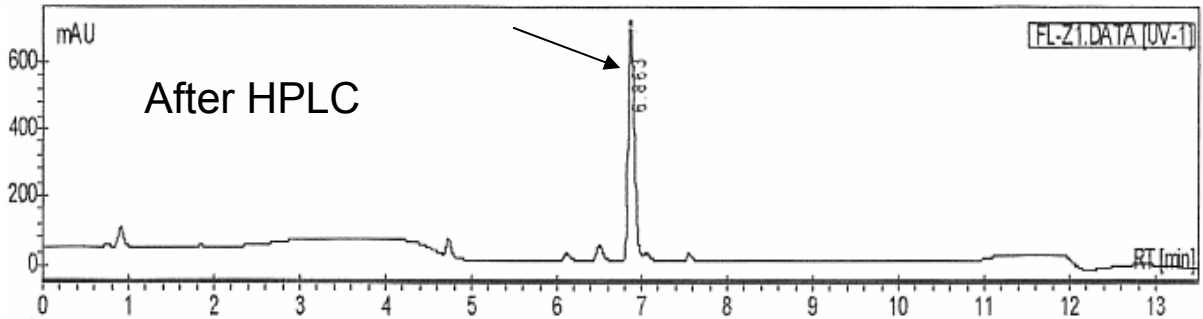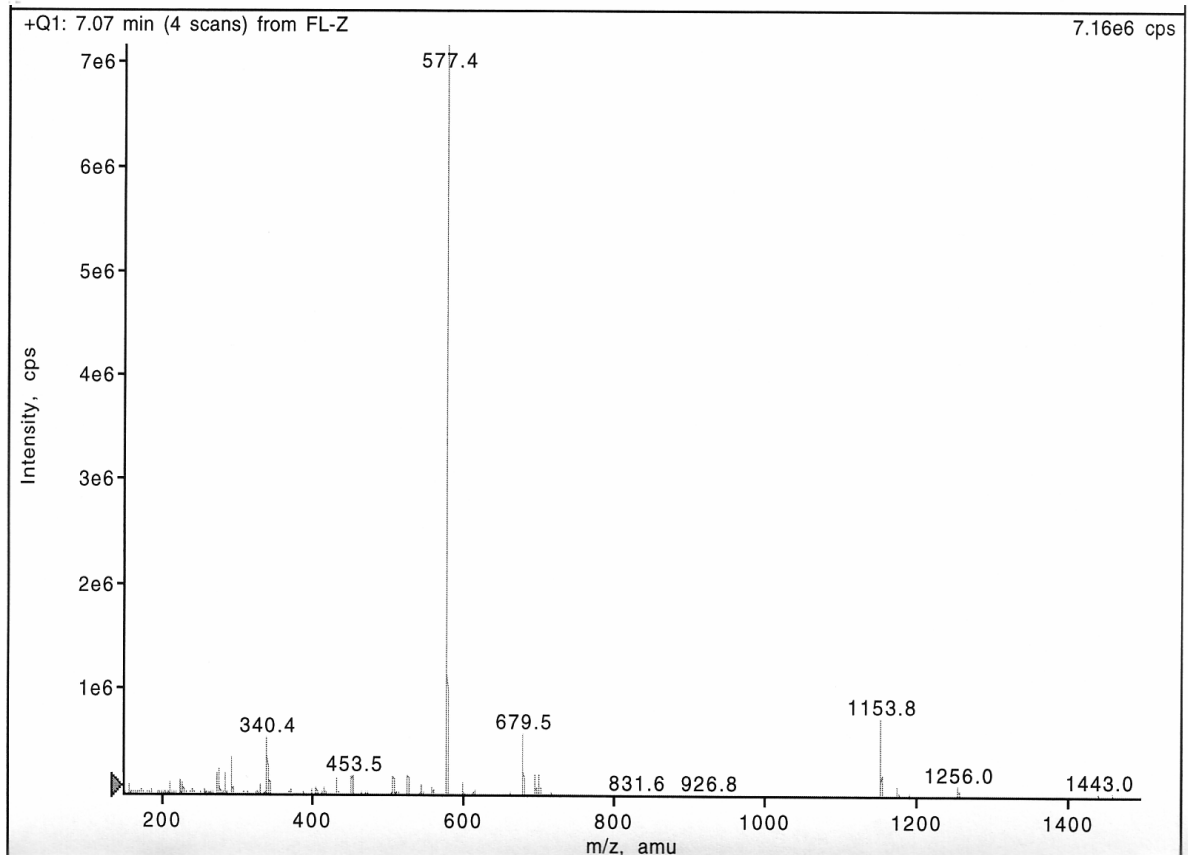

# Compound WY

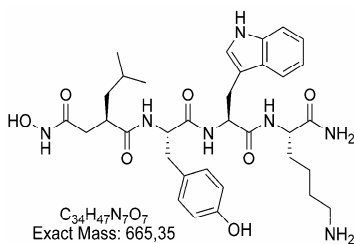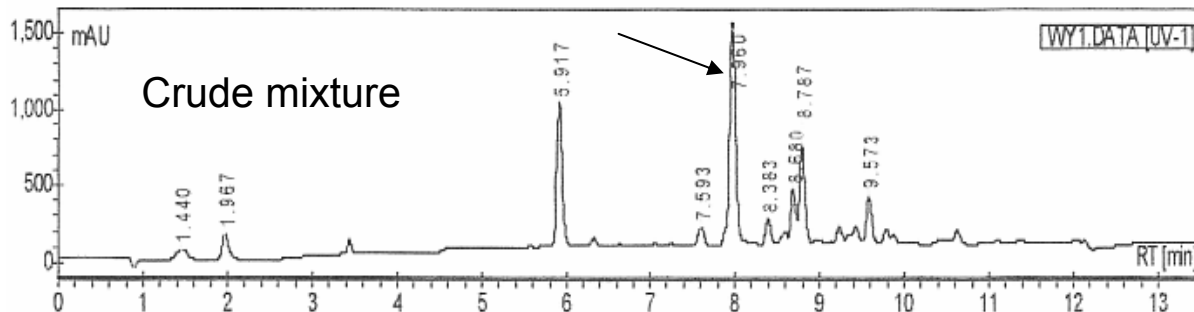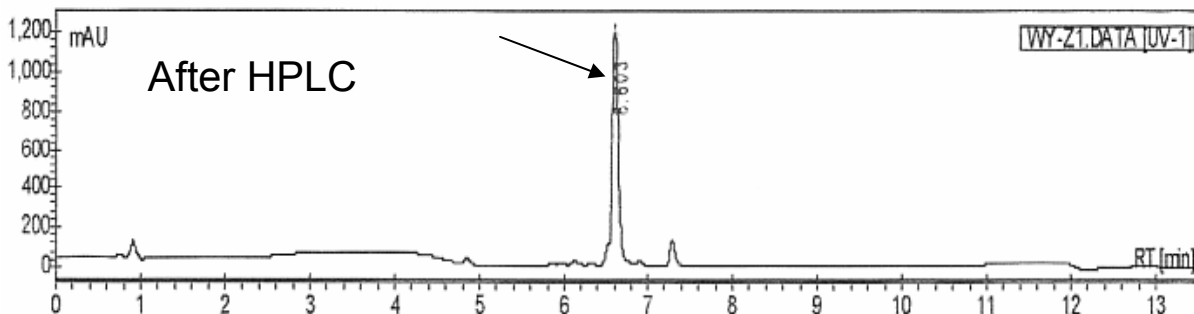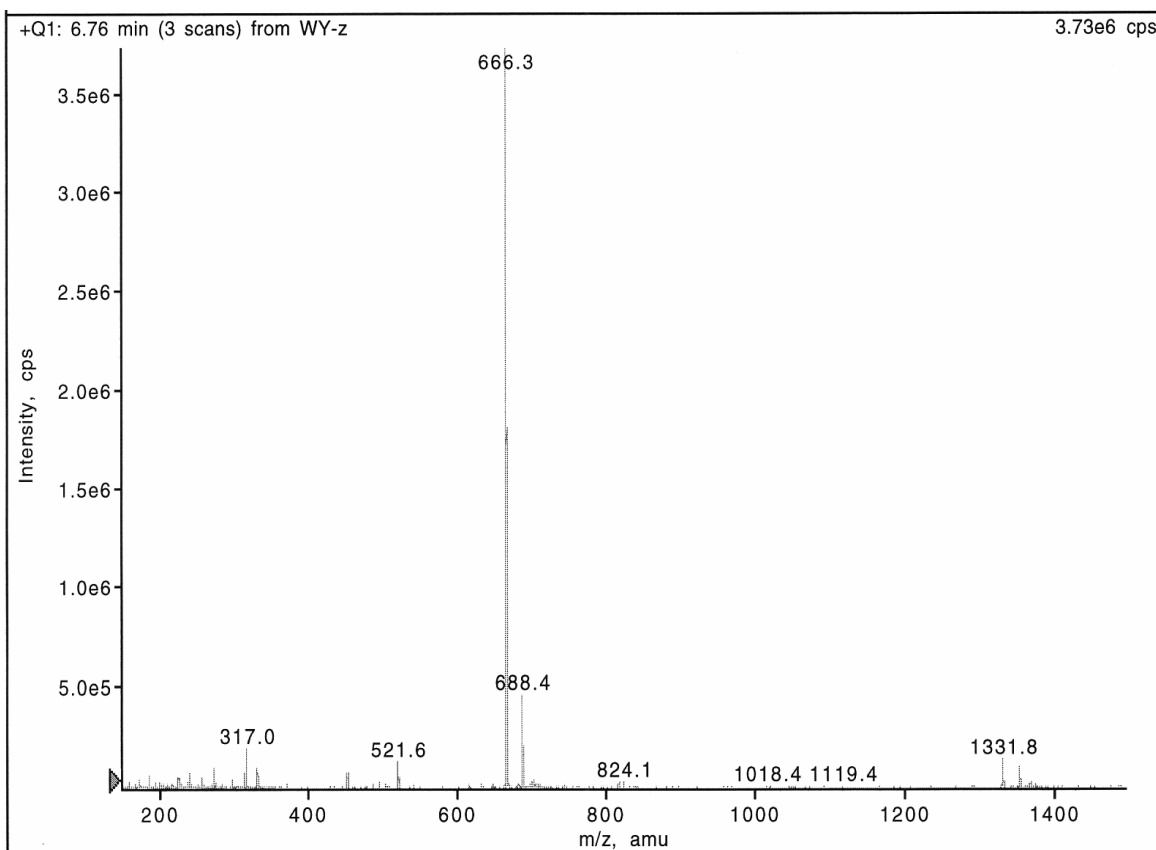

# Compound WD

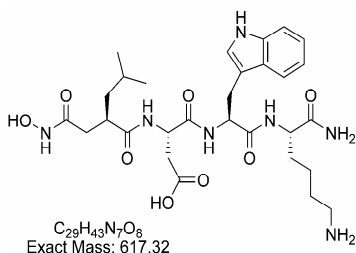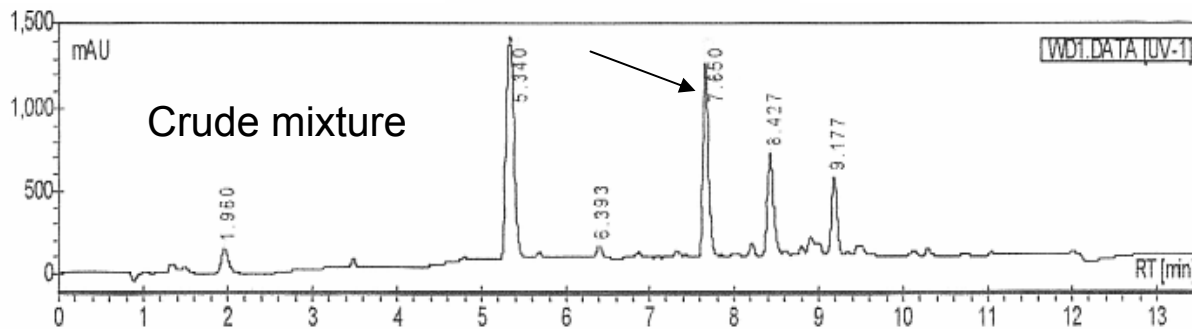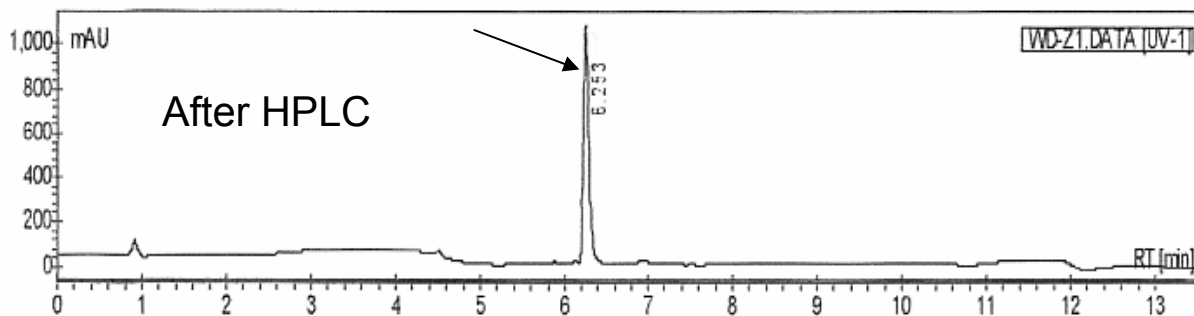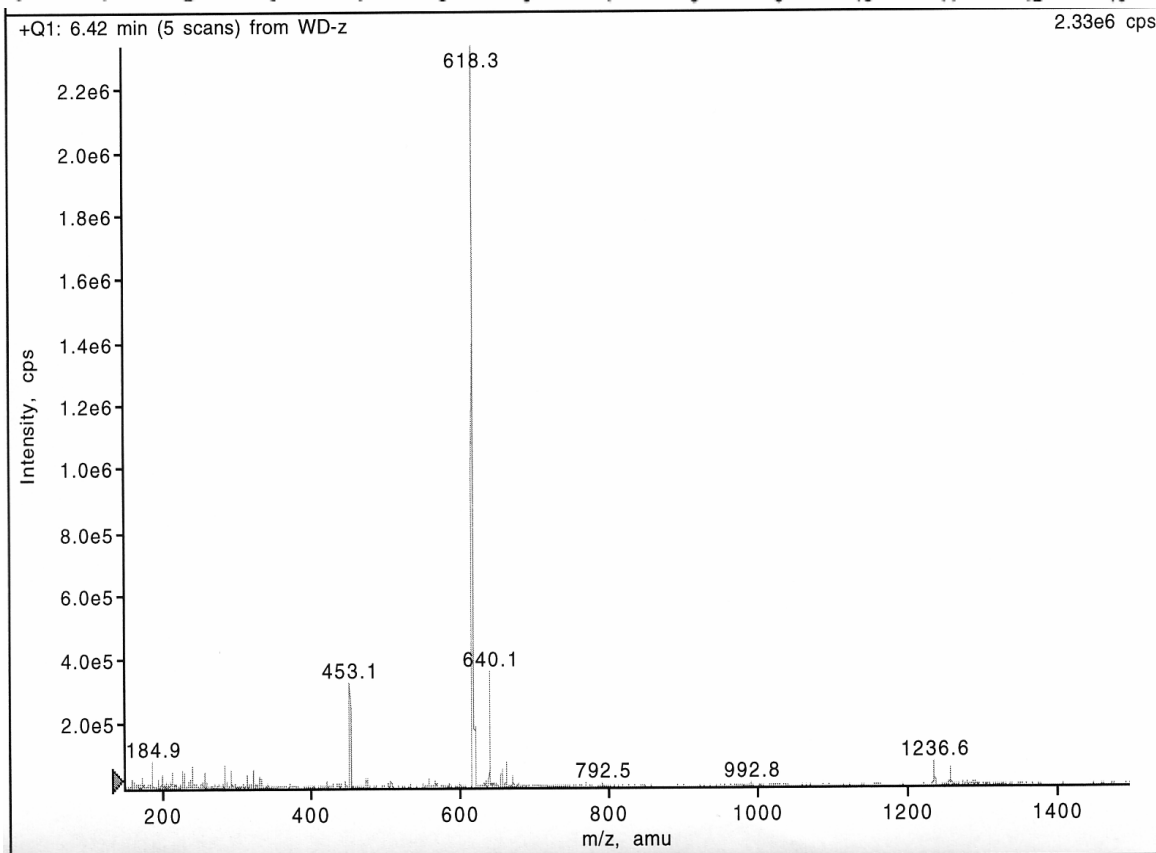

# Compound LW

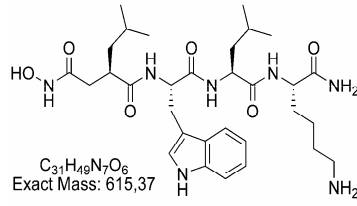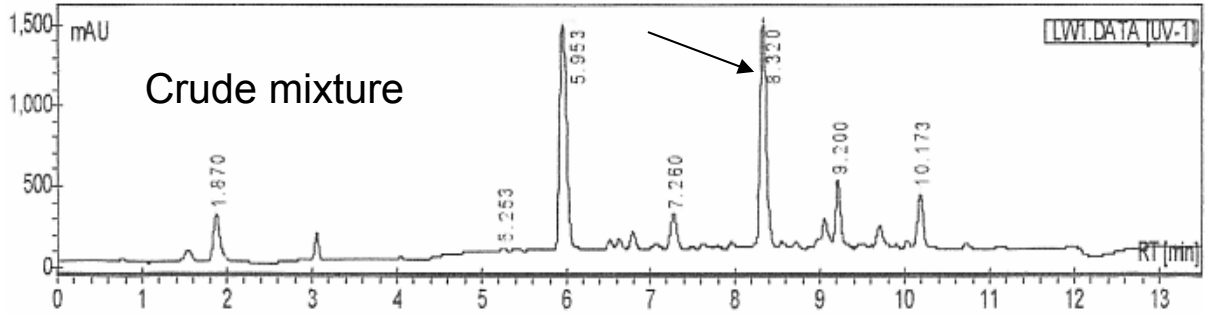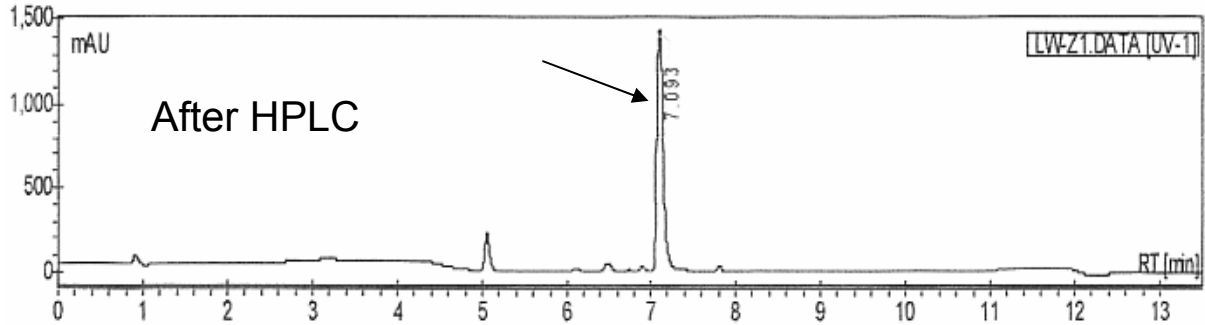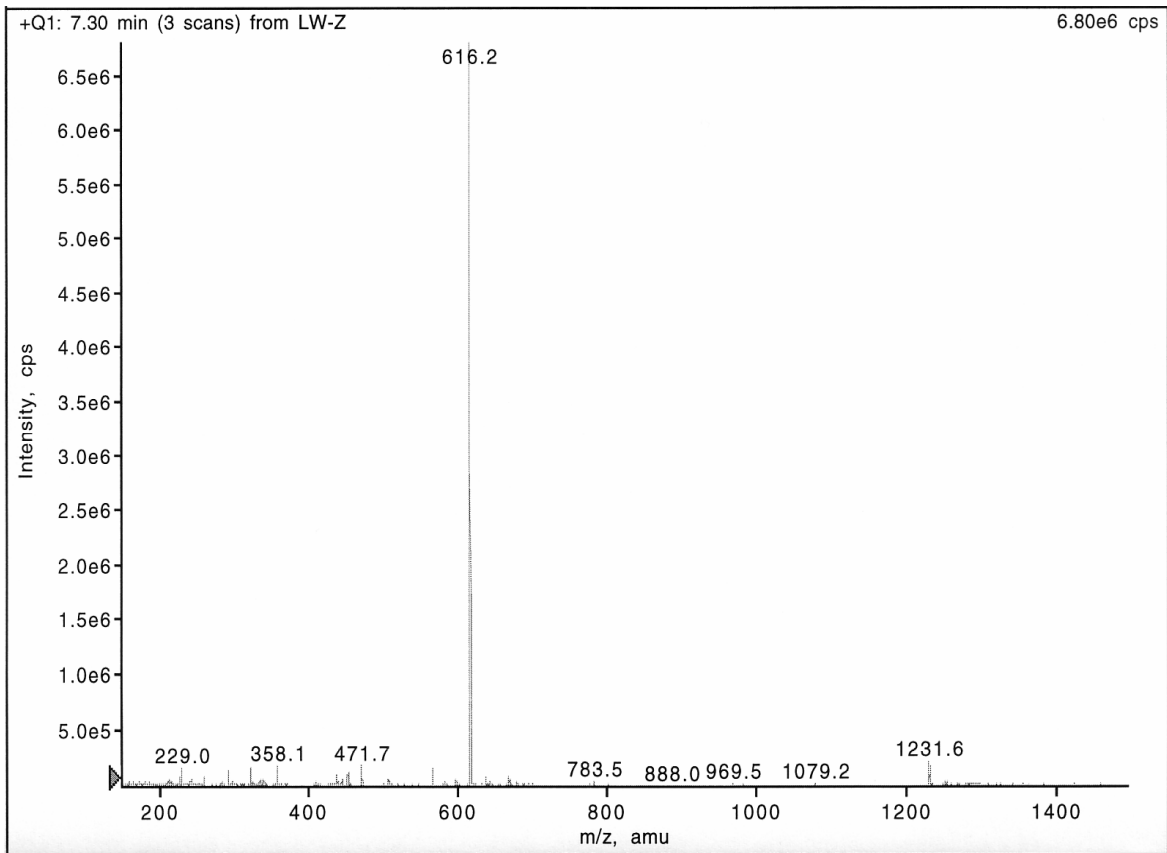



# Compound LD

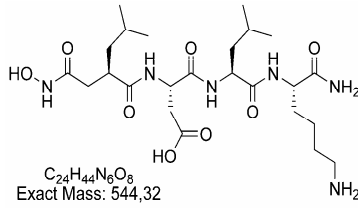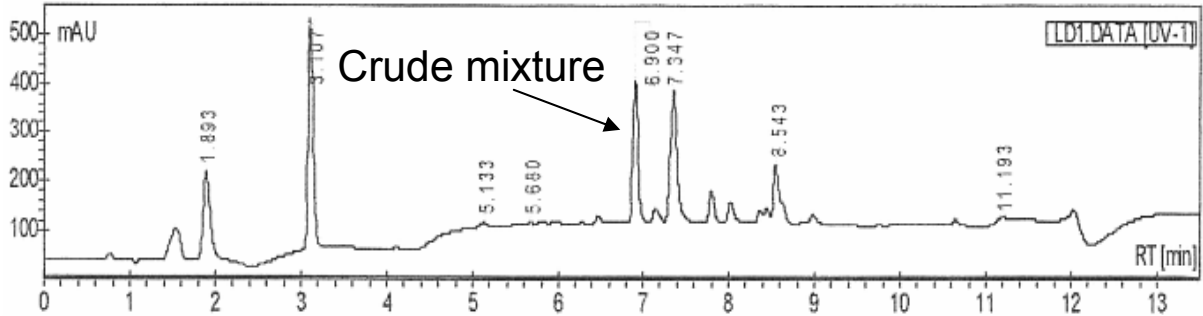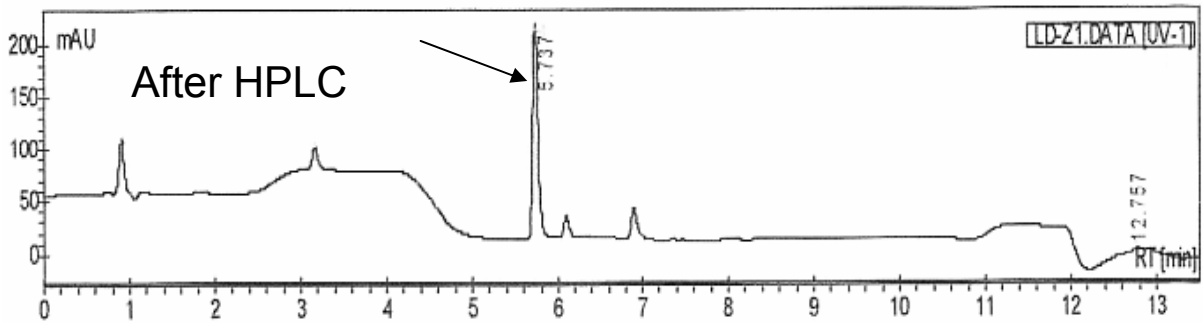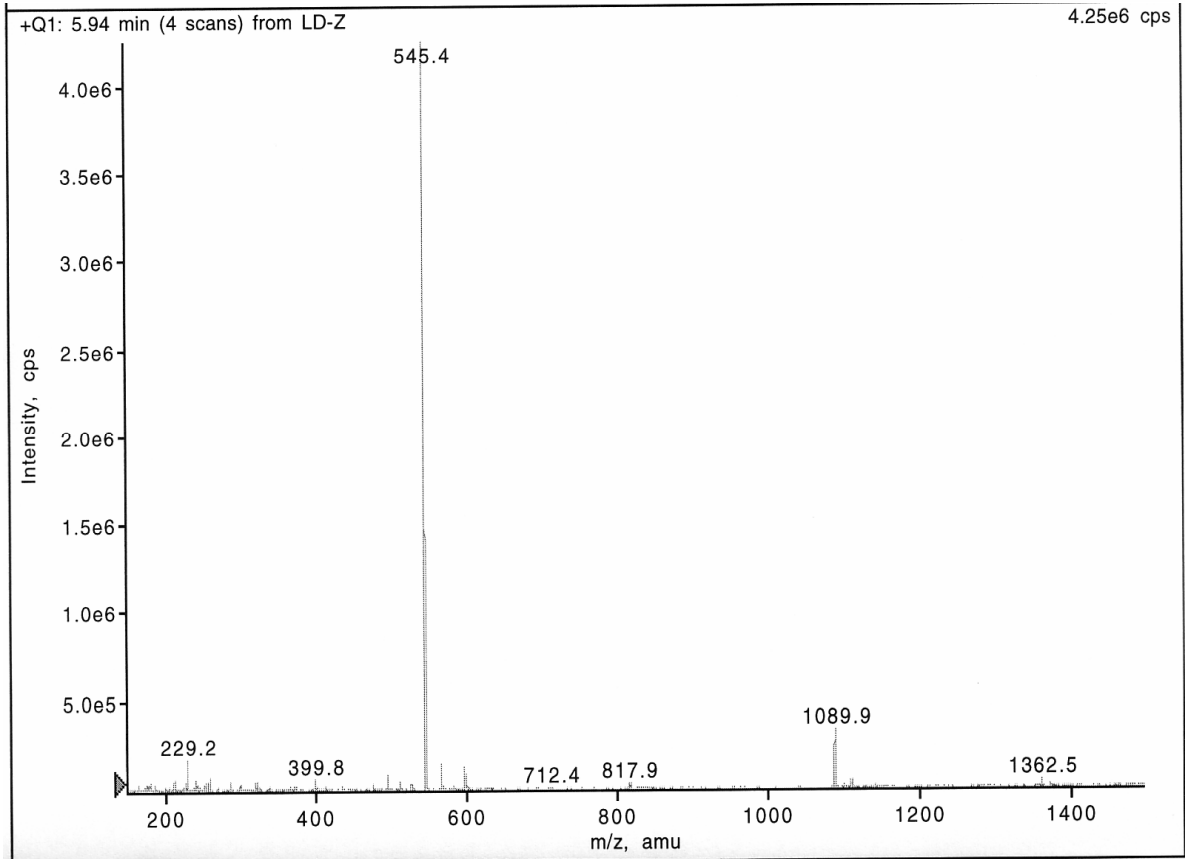

# Compound HW

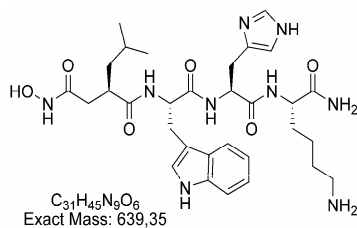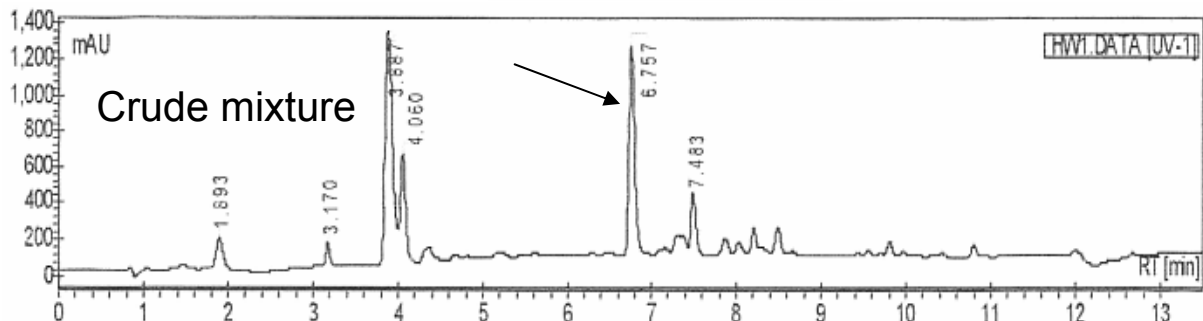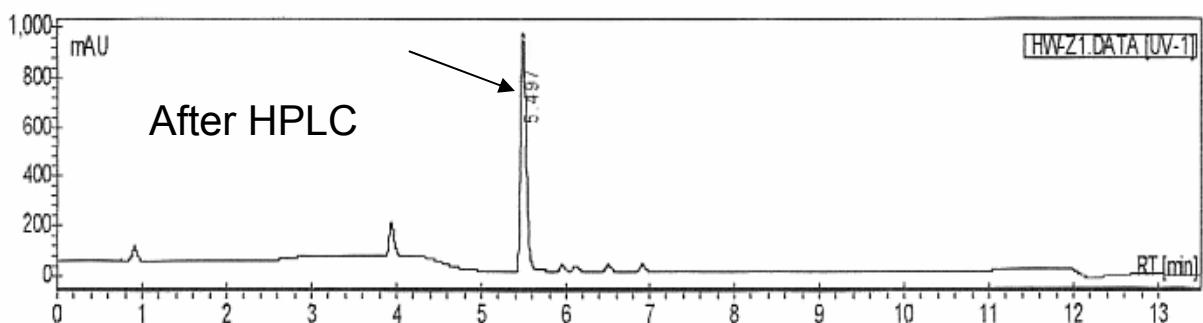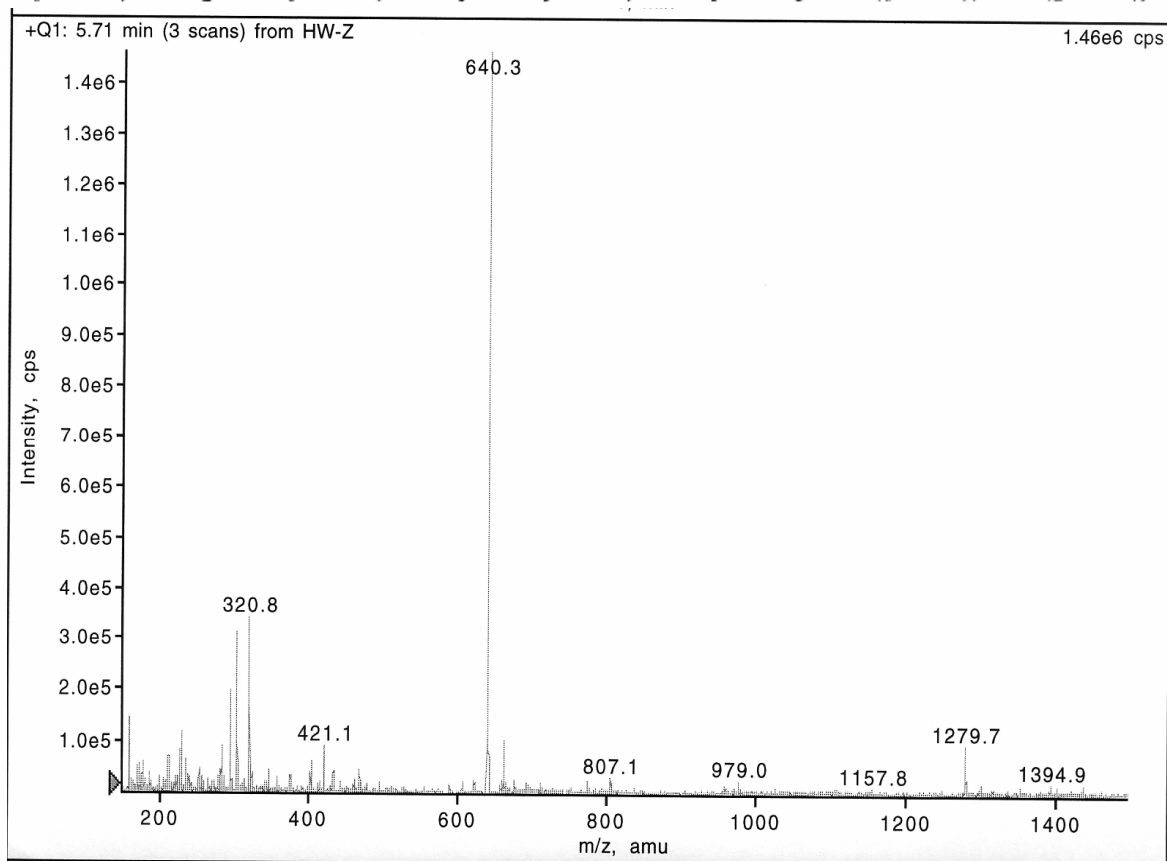

# Compound FD

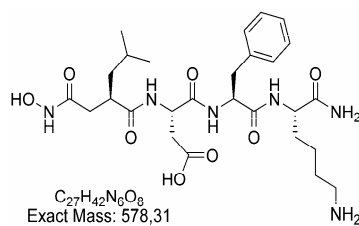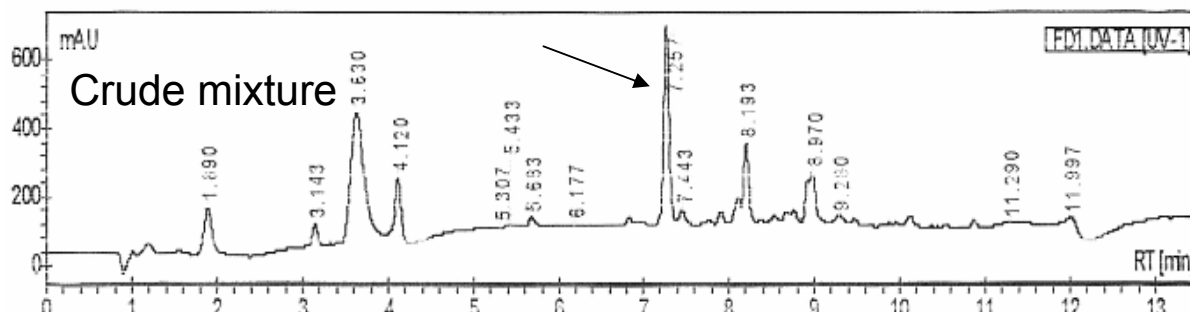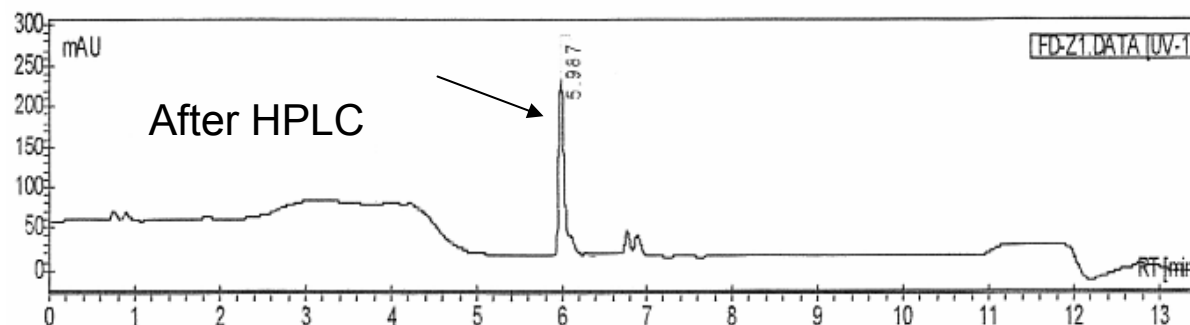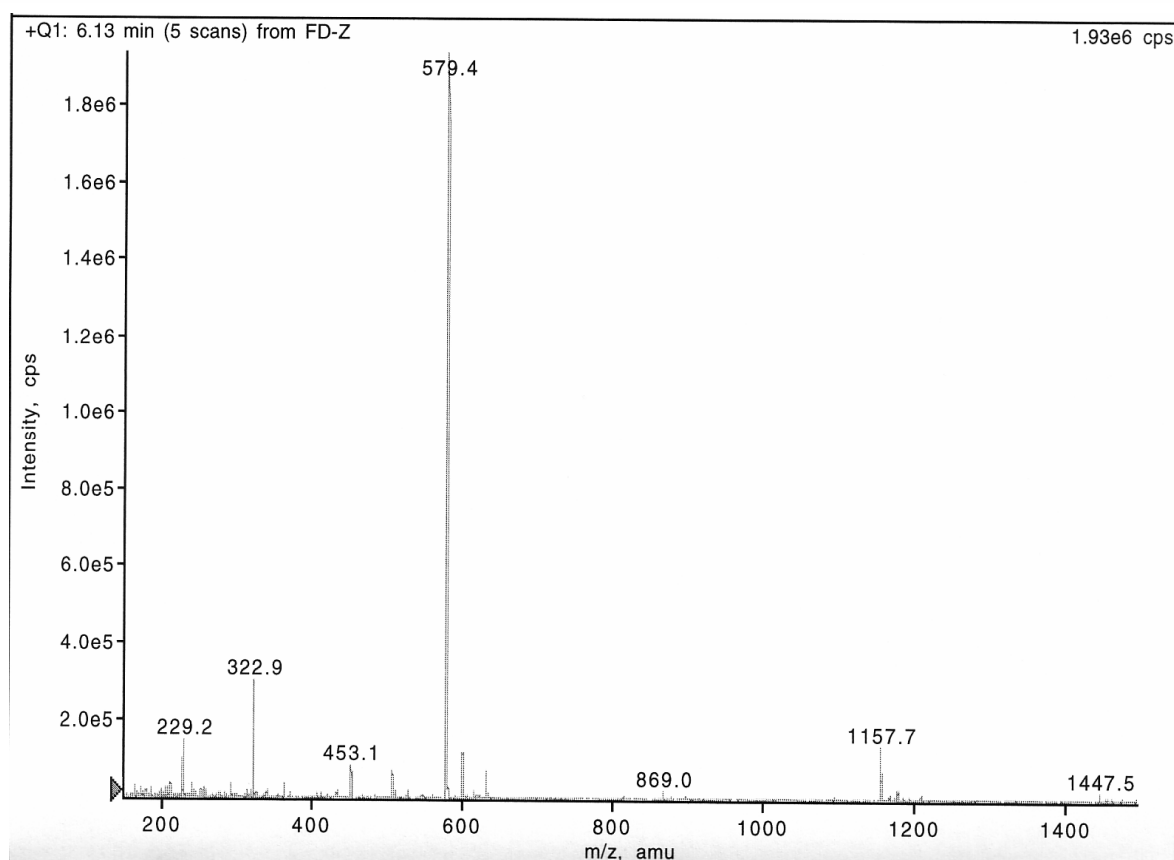

# Compound FV

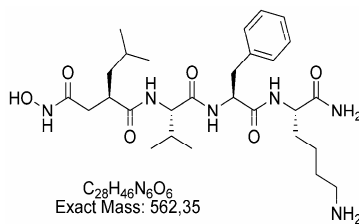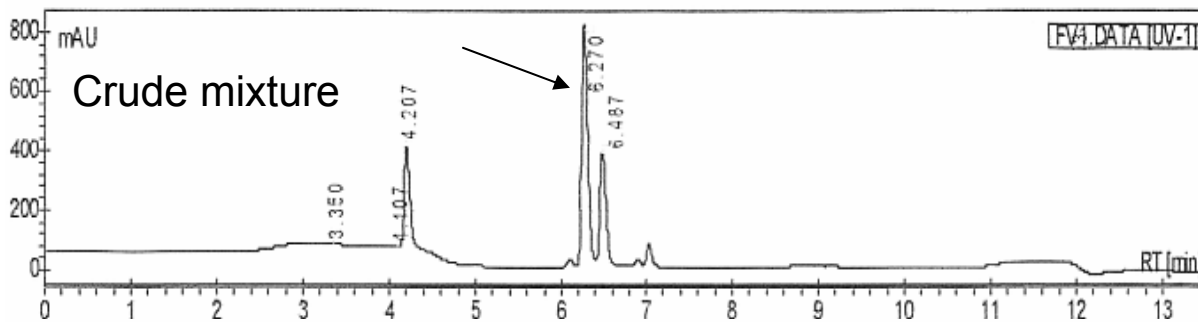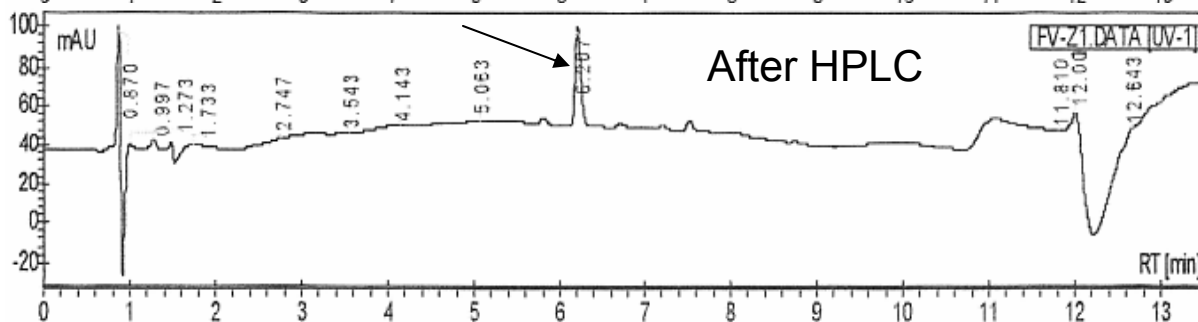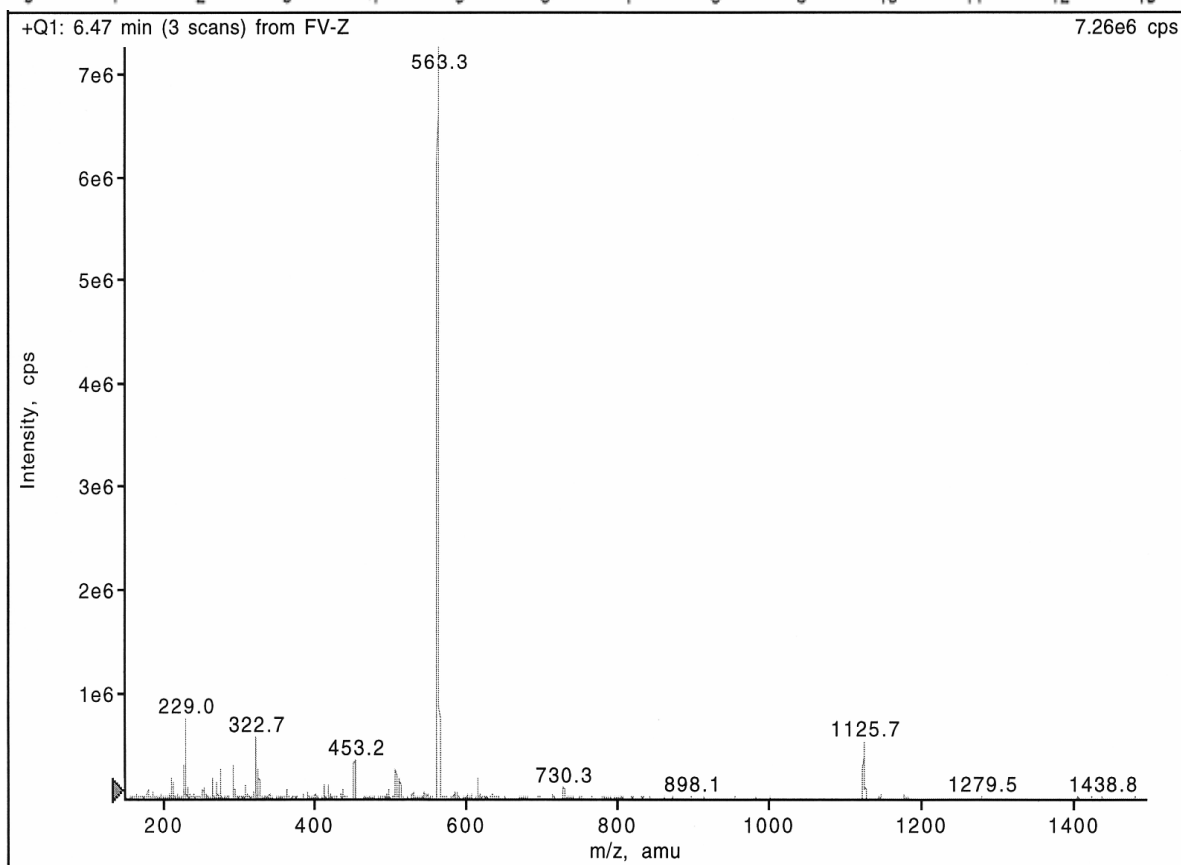

Supplement: b718352f.pdf [file b718352f.pdf]
